# Supplementary material for: Strong response of Pt clusters to the environment and conditions, formation of metastable states, and simple methods to trace the reversible changes
Source: Royal Society of Chemistry journal article supplement (doi:10.1039/d1cp01484f), 2021-01-01
Supplement: d1cp01484f1.pdf [file d1cp01484f1.pdf]

# **Strong response of Pt clusters to the environment and conditions, formation of metastable states, and simple methods to trace the reversible changes**

Alexander S. Lisitsyn and Anastasiya S. Kadtsyna

Borshkov Institute of Catalysis SB RAS, Novosibirsk 630090, Russian Federation

## **Electronic supplementary information**

**S1.** Experimental details for preconditioning the samples to experiments

**S2.** Standard procedures in and between successive runs

**S3.** Control of purity

**S4.** Details of data treatment and presentation

**Fig. S1-S12** illustrating the text in parts S1-S4

**Fig. S13-S32** with additional experimental results

**References**

## **S1. Experimental details for preconditioning the samples to experiments**

In the present study we used 0.5%Pt/ $\gamma$ -Al<sub>2</sub>O<sub>3</sub> and 2.5%Pt/ $\gamma$ -Al<sub>2</sub>O<sub>3</sub> samples that remained in sufficient quantity after our previous works.<sup>S1,S2</sup> The samples were stored in unreduced form. After placing a sample with supported H<sub>2</sub>PtCl<sub>6</sub> into U-type quartz tube (400 mg in the case of 0.5%Pt/ $\gamma$ -Al<sub>2</sub>O<sub>3</sub>, 200 mg for 2.5%Pt/ $\gamma$ -Al<sub>2</sub>O<sub>3</sub>) the tube was attached to the instrument, and the sample was heated in a flow of pure O<sub>2</sub> to 500 °C ( $T_{OX}$ ; 10 °C/min; 1 h at the final temperature). This ensured complete removal of organic substances that could be present after handling the sample in air; simultaneously, the calcination allowed the metal precursor to be uniformly distributed over the support as monoatomic Pt species. The sample was then cooled under O<sub>2</sub> and purged at ambient temperature with He. A flow of pure H<sub>2</sub> was then provided, and the sample was heated in flowing H<sub>2</sub> to the reduction temperature (typically, 400 °C, 10 °C/min, plus 1 h at the final temperature). The flow was then switched to an inert gas (Ar or He, depending on the case), the temperature was ramped to 500 °C, and the sample was degassed at  $T_{DEG}$  of 500 °C for 20-30 min.

## **S2. Standard procedures in and between successive runs**

*(1) After CO chemisorption measurements and experiments on H<sub>2</sub>-by-CO displacement:* H<sub>2</sub>, RT→400 °C (hydrogenation of adsorbed CO); He, 400 °C, 5 min; He, 400→500 °C; He, 500 °C, 10 min; He, 500→ $T_{TR}$  (if a new experiment with H<sub>2</sub> treatment was intended); H<sub>2</sub>, at  $T_{TR}$ , 15 min; H<sub>2</sub>,  $T_{TR}$ →RT; He (RT), 10 min; +CO (new experiment).

*(2) During and between CO-TPD runs:* CO dosing (RT); He (RT), 10 min; He, 30→500 °C, 50 °C/min (TPD run); short-time cooling in He; H<sub>2</sub>, to 400 °C (hydrogenation of residual CO); He, 400 °C, 5 min; He, 400→500 °C; He, 500 °C, 10 min; He, 500→ $T_{TR}$  (if repeated H<sub>2</sub> treatment was intended); H<sub>2</sub>,  $T_{TR}$ , 15 min; H<sub>2</sub>,  $T_{TR}$ →RT; He (RT), 10 min; +CO (new experiment).

*(3) During and between TPO runs:* CO treatment (a flow of 5%CO/He for 10 min); He (RT), 10 min; 5%O<sub>2</sub>/He (RT), 10 min; 5%O<sub>2</sub>/He, 30→300 °C, 25 °C/min (TPO run); short-time cooling in He; H<sub>2</sub>, to 400 °C; He, 400 °C, 5 min; He, 400→500 °C; He, 500 °C, 10 min; He, 500→ $T_{TR}$  (if repeated H<sub>2</sub> treatment was intended); H<sub>2</sub>,  $T_{TR}$ , 15 min; H<sub>2</sub>,  $T_{TR}$ →RT; He (RT), 10 min; +CO (new experiment).

If not specified otherwise in the protocols, heating rates were 25 °C/min (nominally) and flow rates 25 cc/min, for all gases and gaseous mixtures, both for treatments and purging. In the text above, semicolons separate consecutive steps, RT stays for room temperature and  $T_{TR}$  for a certain treatment temperature. The sample was left overnight under a slow flow of inert gas and the experiments continued next day, starting from H<sub>2</sub> retreatment and degassing (H<sub>2</sub>, RT→400 °C; He, 400→500 °C).

### S3. Control of purity

The methods used for contamination estimates were the same as in our previous works and their detailed description can be found in ref. S1. Small concentrations of O<sub>2</sub> in inert gases were usually estimated *via* treating Pt/ $\gamma$ -Al<sub>2</sub>O<sub>3</sub> in flowing gas for different times and measuring the changes in apparent adsorption capacity to O<sub>2</sub> or H<sub>2</sub>. The  $\Delta OC$  and  $\Delta HC$  values so obtained correspond to the additional quantity of O<sub>2</sub> that came with the carrier gas into the sample zone for the additional time,  $\Delta t$ , and became adsorbed (note that  $\Delta HC = -2\Delta OC$ ). This allowed a quality-control check at any time during a series of experiments with a sample, without uninstalling the sample tube or redesigning the connections. One may see example of such tests in Fig. S1. The results were always consistent with those that were obtained with the aid of color-altering O<sub>2</sub> scavengers.<sup>S1</sup> Note that the [O<sub>2</sub>] value so obtained includes all O<sub>2</sub> that appeared in the gas, through any leaks, on the way to the sample.

Purity of our gases was >99.999%, before entering the system, and special measures were taken to minimize *diffusion* of air oxygen through nonmetallic components of the instrument, such as sealing rings.<sup>S1</sup> As a result, the concentration of O<sub>2</sub> in the carrier gases was reduced to 1-2 ppm, as measured *in the sample zone*. In these conditions, it takes more than 10-20 h for O<sub>2</sub> impurities to cover all Pt surface, depending on Pt loading and sample mass. We started chemisorption measurements and TPD runs *ca.* 15 and, accordingly, 30 min after sample degassing (the times sufficient for cooling the sample and clamshell furnace, respectively), and the minute traces of oxygen could not violate the results. Confirmation was obtained for all types of experiments (chemisorption, H<sub>2</sub>-by-CO displacement, and TPD). Demonstrative examples are provided in Fig. S2 and S3.

The results of those tests simultaneously argue against significant effects of H<sub>2</sub>O impurities on adsorption/desorption properties. In comparison to O<sub>2</sub>, water molecules diffused more

readily into the gas lines, and the concentration of water vapors in the gas phase was larger than [O<sub>2</sub>], yet still sufficiently small (5-15 ppm, as detected in the sample zone, using an empty tube). The presence of water vapors in such amounts was beneficial for our purposes, as it helped to maintain the degree of hydroxylation of alumina surface during the successive runs at (nearly) constant level.

For estimating the amount of carbonaceous deposits on a sample, we applied routine tests using O<sub>2</sub>-annealing and measuring the amount of CO<sub>2</sub> formed.<sup>S1</sup> The tests showed that the cleaning procedures used, both before starting the experimental session and between the consecutive runs, effectively eliminate all carbon-containing species. Figure S4 shows the results of another test, confirming the basic ones.

#### S4. Details of data treatment and presentation

The adsorption/desorption processes were monitored by using TCD and MS. Preference was given to TCD due to its constant sensitivity and good linearity (signal intensity *vs.* probe volume). Examples of calibration plots for H<sub>2</sub> in Ar are provided in Fig. S5. The Table below lists relative sensitivities to H<sub>2</sub>, CO, and CO<sub>2</sub>, as found experimentally from the slopes of *S-vs-V* plots (as in Fig. S5, lower panel). When repeated in different times but under identical conditions, TCD calibrations matched each other. During a series of experiments, the detector sensitivity was routinely checked by dosing a 10H<sub>2</sub>/Ar or 10%CO/He mixture from the loop and measuring the area of resulting peak, *S<sub>d</sub>* (as in H<sub>2</sub> or CO chemisorption measurements but in bypass to the sample tube). This was done daily. The *S<sub>d</sub>* values could vary, within 5 rel% utmost, due to varying ambient conditions (*P* and *T*, which slightly influence the probe volume and flow rate of carrier gas). When necessary, correction was made.

TCD calibration data (molar sensitivity to H<sub>2</sub> in Ar was taken for unity).

|                              | H <sub>2</sub> | CO   | CO <sub>2</sub> |
|------------------------------|----------------|------|-----------------|
| <b>Ar</b> as the carrier gas | 1              | 0.08 | 0.04            |
| <b>He</b> as the carrier gas | ~0.04*         | 1.50 | 1.75            |

\*Rough value, corresponding to the case of low H<sub>2</sub> concentrations in He.

Calibration of mass spectrometer to CO and CO<sub>2</sub> was made analogously, and the results obtained with MS and TCD were in close agreement (see Fig. S6). As compared to TCD, the sensitivity of MS was less constant and needed more attention; besides, quantitative measurements for H<sub>2</sub> were not possible in this case.

Following each experimental run (chemisorption, TPD, or TPO), the carrier gas was directed to the detector(s) in bypass to sample tube. This allowed to check the background level and to subtract the baseline correctly. Aside from the subtraction of baseline, the curves in all figures are presented as recorded in experiments, without smoothing or averaging.

The amount of CO consumed during CO pulse chemisorption was calculated by formula:  $V_a = V_d(N - \sum S_i/S_d)$  μmol, where  $V_d$  is the amount of CO per pulse,  $N$  the number of injections,  $S_i$  the area under  $i^{\text{th}}$  peak, and  $S_d$  the area corresponding to the dose at zero consumption. The latter value was found in the same experiment, by injecting the dose into the carrier gas bypassing the sample tube. Supplementary data in Fig. S7-S9 confirm that all samples fully consume the first doses of CO, are rapidly saturated by a few doses, and no further adsorption takes place in these conditions if additional doses of CO are provided. Using helium as the carrier gas leads to a strong decrease of TCD sensitivity towards H<sub>2</sub>, and evolving H<sub>2</sub> does not seriously affect the measurements for heavy gases, such as CO. The tiny peaks that are detectable by TCD after the first one-two doses of CO to H<sub>2</sub>-pretreated Pt/γ-Al<sub>2</sub>O<sub>3</sub> relate exclusively to evolving H<sub>2</sub>. It may seem surprising that the hydrogen peaks in Fig. 1a in the main text, as well as in Fig. S7 and S8, have the same polarity as CO peaks, but such an effect is well known for low-concentrated H<sub>2</sub>-in-He mixtures.<sup>S3,S4</sup>

No methane formation took place during CO chemisorption (Fig. S9), and traces of methane were only detected during CO TPD (in amounts ≤ 1 % of CO). The absence of other products apart from CO, CO<sub>2</sub>, and H<sub>2</sub> made it possible to monitor the desorption process using TCD, by tuning it to H<sub>2</sub> (Ar as the carrier gas) or to CO (by using He as the carrier gas and trapping CO<sub>2</sub> at 77 K). In the latter case, CO TPD run was followed by measuring the amount of CO<sub>2</sub> accumulated in the trap.

The high heating rate in TPD experiments, 50 °C/min, was provided for the purpose of enhancing the desorption rate and, so, the concentration of desorbed species in the carrier gas (signal-to-noise ratio). This allowed reliable monitoring of the desorption process even at low Pt loading. In the experiments on temperature-programmed oxidation, it was possible to

provide slower heating, and CO<sub>ads</sub>-TPO runs were performed at nominal heating rate of 25 °C/min.

Heating was controlled by a thermocouple embedded in the furnace, and real temperature,  $T_{\text{exp}}$ , was measured by thermocouple in the middle of sample. As the temperature regime in all TPD experiments, as well as in all TPO runs, was the same,  $T_{\text{exp}}$ -vs- $t$  curves were also very similar; some difference could only originate from non-identical positions of thermocouple inside the sample. Therefore, we preferred to use predetermined  $T$ -vs- $t$  plots and insert thermocouple outside the sample tube, thereby preventing any interference from the thermocouple on results.

In view of the temperature lag at the beginning of heating and because heating was followed by an isothermal hold, TPD curves in all figures are presented as a concentration-vs-time plots, with a linear scale for the concentration and time. In this case, the area under a curve at a time  $t$  is directly proportional to the volume of a gas that has been desorbed and reached the detector by that time.

For convenience, we provide Fig. S10–S12, which are the same as Fig. 4, 5, and 7 in the main text but include  $T$ -vs- $t$  plots for those experiments. It was taken into account that the gas mixture living the sample tube needs some time to arrive at the detector (0.5-1 min in our case, if the trap is used and depending on the temperature of the trap). Therefore, at a time  $t$ , the detector “sees” events that took place a little bit earlier, when the sample temperature was lower than  $T_{\text{exp}}$  at the time  $t$ . Solid purple lines in Fig. S10-S12 show  $T_{\text{exp}}$ -vs- $t$  curves as recorded in the experiments, while dashed purple curves show temperatures  $T^*$  that truly correspond to TCD response, *i.e.*, with account for the time lag between the sample reaction and TCD response.

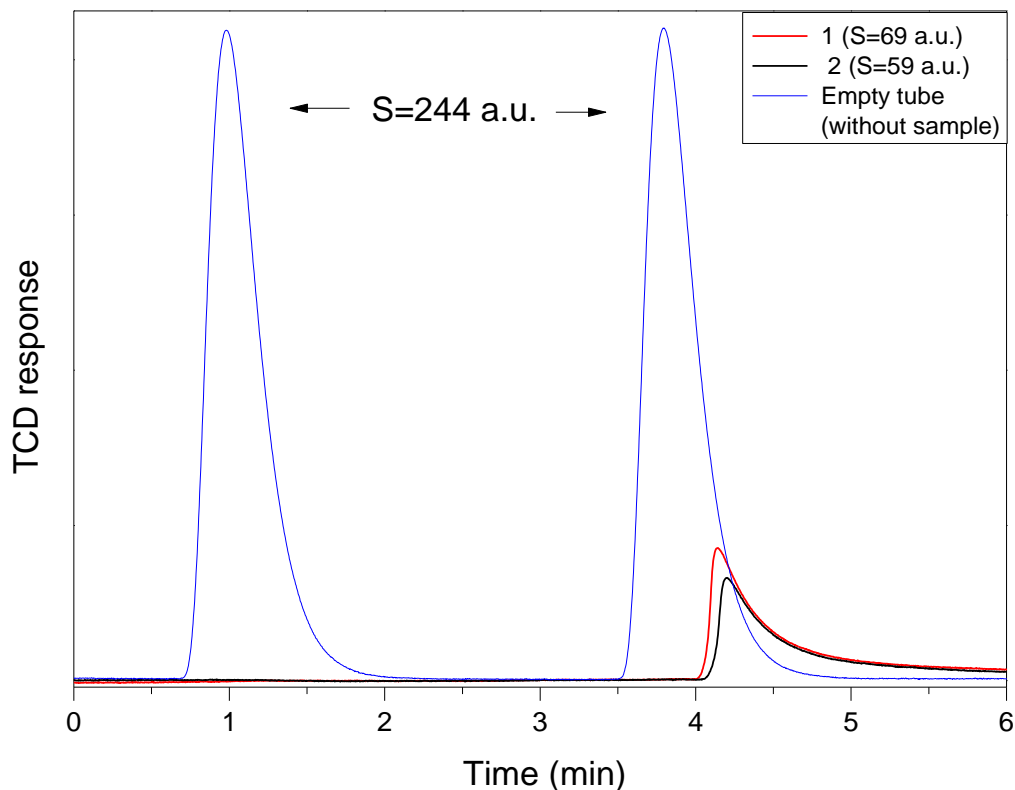

**Fig. S1.** Estimating the amount of  $O_2$  impurities in the carrier gas with the aid of  $H_2$  chemisorption (HC). In case 1, 0.5%Pt/ $Al_2O_3$  sample was degassed in Ar under standard conditions (500 °C, 10 min), then cooled to room temperature (for 10 min; total time in Ar 20 min), and finally treated by two 72- $\mu$ l doses of  $H_2$ . In case 2 (black curve), pretreatments were the same as before, but the sample was additionally kept under Ar for 30 min before  $H_2$  dosing; total time in Ar 50 min. The difference in the areas under the red and black curves corresponds to the extra amount of  $H_2$  that was consumed due to the reaction with adsorbed oxygen (accumulated for 50-20=30 min). The difference only equals to ~2% of the  $H_2$  adsorbed.

Note that under the conditions in this figure the sample fully consumes the first dose of  $H_2$ . If it was left under the Ar flow for much longer time, ~20 h, or intentionally dosed with  $O_2$ , by pulsing, it consumed almost three such doses of  $H_2$ .

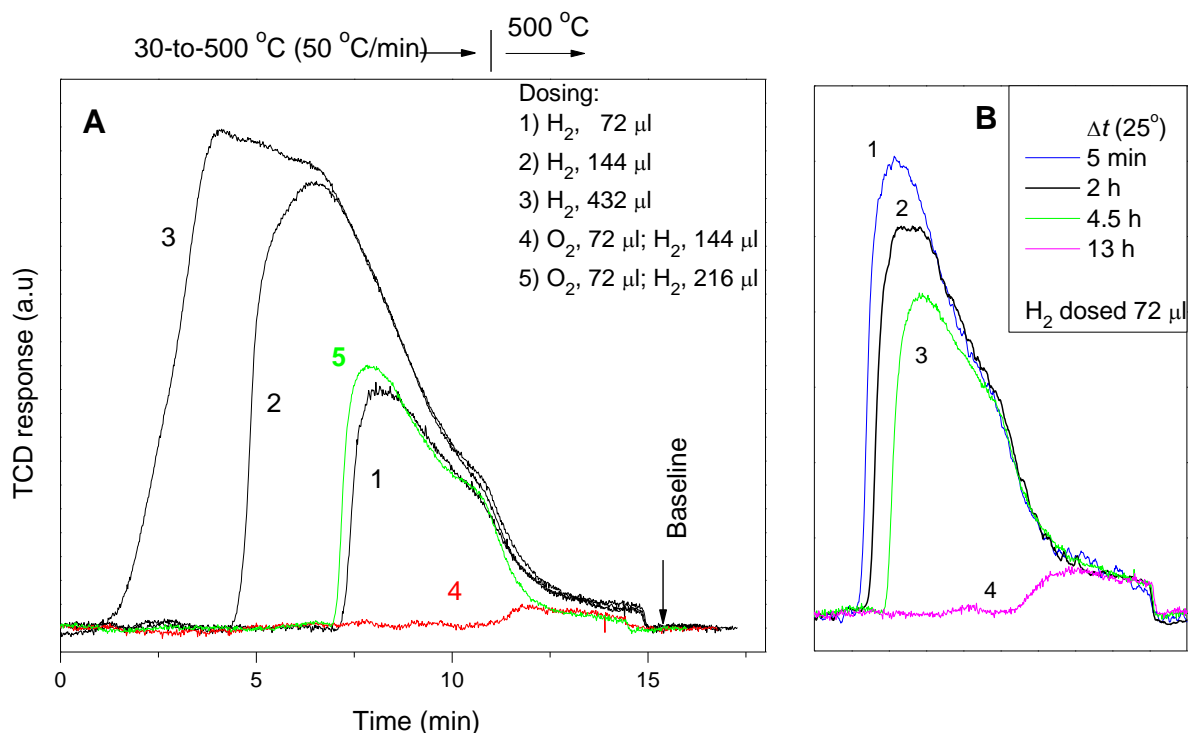

**Fig. S2.** An extended series of experiments on estimating the degree of Pt oxidation by O<sub>2</sub> traces in the carrier gas. **A:** H<sub>2</sub> TPD from 2.5%Pt/γ-Al<sub>2</sub>O<sub>3</sub> (200 mg) after treating the sample by varying amounts of H<sub>2</sub> and O<sub>2</sub>; **B:** changes in H<sub>2</sub>-TPD trace with the time of sample exposure to the carrier gas. Before each of the runs, the sample was degassed in Ar at 500 °C for 10 min, and H<sub>2</sub>/O<sub>2</sub> injections were made at room temperature. Further details are provided in the figure and in the attached Table.

Curves 1-3 in panel A indicate that the amount of H<sub>2</sub> in one 72-μl pulse is sufficiently small to be fully retained by the sample, and the hydrogen desorbs only at a high temperature. Therefore, a decrease in the curve area can only be expected from side processes, such as reaction of H<sub>2</sub> with adsorbed oxygen. When a 72-μl dose of O<sub>2</sub> is provided to the sample, the adsorbed oxygen consumes two further doses of H<sub>2</sub> (case 4 in A), but three doses of H<sub>2</sub> result in curve 5, which area equals to that in run 1, as expected. The absence of H<sub>2</sub> evolution during run 4 simultaneously indicates that oxidation of Pt by H<sub>2</sub>O, which was formed through the O<sub>2</sub>+H<sub>2</sub> reaction, does not take place.

In case 1 in B, the duration of pretreatments was reduced to minimum (H<sub>2</sub> was dosed 5 min after sample degassing). The area under curve 1 in B is somewhat smaller than expected for the 72-μl dose of H<sub>2</sub> (in this series,  $S_0 = 243 \pm 3$  units), but this is mainly due to the strong retention of residual hydrogen by the sample (the hydrogen still evolves at the end of the runs). By comparing curves 1-4 in B and corresponding  $S$  values in the attached Table, one can see that it takes half a day for O<sub>2</sub> impurities to be accumulated in amounts sufficient to react with all H<sub>2</sub> in the dose, making H<sub>2</sub> desorption barely visible (curve 4 in B).



When the pretreatments were performed in He, instead of Ar, the results were similar to those presented above.

Experimental details to Figure S2:

|          | Predosing<br>(STP values)                                                | $\Delta t^*$     | Curve area<br>S (a.u) |
|----------|--------------------------------------------------------------------------|------------------|-----------------------|
| <b>A</b> |                                                                          |                  |                       |
| 1        | H <sub>2</sub> , 72 $\mu$ l                                              | 35 min           | 178                   |
| 2        | H <sub>2</sub> , 2 $\times$ 72 $\mu$ l                                   | 35 min           | 447                   |
| 3        | H <sub>2</sub> , 6 $\times$ 72 $\mu$ l (in excess)                       | 45 min           | 693                   |
| 4        | O <sub>2</sub> , 72 $\mu$ l, then H <sub>2</sub> , 2 $\times$ 72 $\mu$ l | 40 min           | ~0                    |
| 5        | O <sub>2</sub> , 72 $\mu$ l, then H <sub>2</sub> , 3 $\times$ 72 $\mu$ l | 40 min           | 180                   |
| <b>B</b> |                                                                          |                  |                       |
| 1        | H <sub>2</sub> , 72 $\mu$ l                                              | 5 min            | 198                   |
| 2        | H <sub>2</sub> , 72 $\mu$ l                                              | 2 h              | 181                   |
| 3        | H <sub>2</sub> , 72 $\mu$ l                                              | 4.5 h            | 144                   |
| 4        | H <sub>2</sub> , 72 $\mu$ l                                              | 13 h (overnight) | 16                    |

\* Holding time in the carrier gas after degassing (before dosing H<sub>2</sub> and starting TPD).

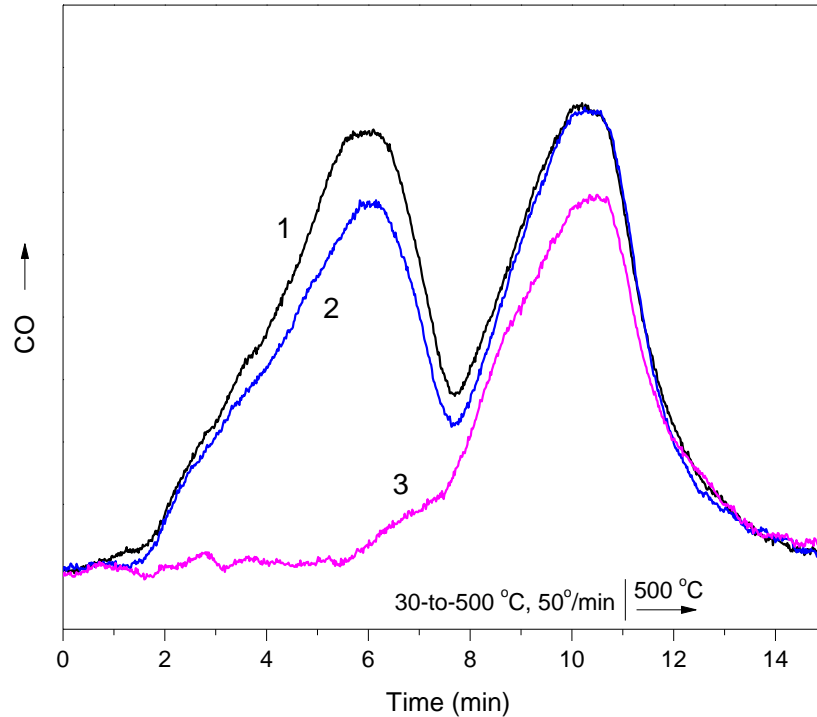

**Fig. S3.** Estimating the possible influence of O<sub>2</sub> impurities on CO-TPD pattern. In case 1, the 0.5%Pt/Al<sub>2</sub>O<sub>3</sub> sample was pretreated under standard conditions (degassing, cooling, and CO pulsing, 20 min after degassing). In case 2, the exposure time in the flow of He at RT before CO dosing was increased to 2 h. In case 3, a pulse of O<sub>2</sub> was provided to the sample before CO pulsing (72 μl, O<sub>ads</sub>/Pt = 0.46).

Both CO chemisorption and TPD run were performed with trapping CO<sub>2</sub> at 77 K, and the amounts of CO<sub>2</sub> accumulated in the trap in experiments 1-3 equaled to 2.4, 2.7, and 7.1 μmol, respectively. The additional quantity of CO<sub>2</sub> that was formed in experiment 3 ( $\Delta_{3-1}$  4.7 μmol) corresponds to the amount of O (4.6 μg-atom) that was intentionally pre-adsorbed, while the increment in CO<sub>2</sub> formation in run 2,  $\Delta_{2-1}$ , is only 0.3 μmol.

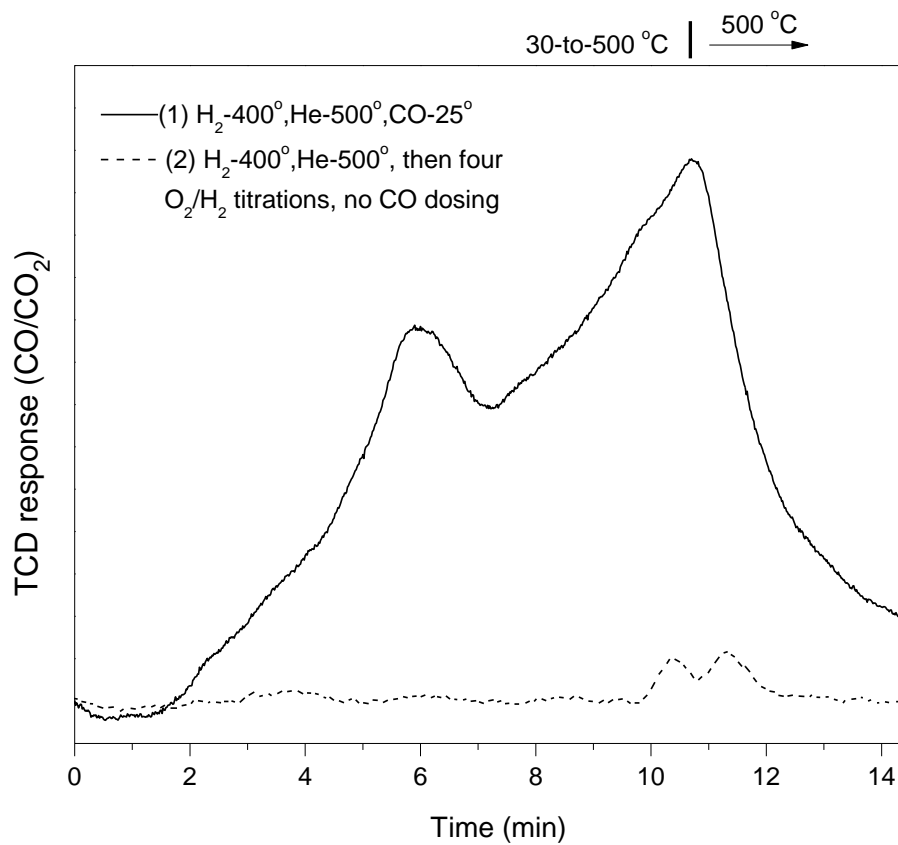

**Fig. S4.** Control experiments on the absence of carbonaceous species in the sample after its standard cleaning between successive runs. Here, solid curve shows CO/CO<sub>2</sub> desorption from a 0.5%Pt/ $\gamma$ -Al<sub>2</sub>O<sub>3</sub> sample with preadsorbed CO; the trap before TCD was cooled to ~170 K to trap H<sub>2</sub>O but to allow CO<sub>2</sub> to remain untrapped. Following the first run and cleaning procedures (section S2, protocol 2), TPD run was repeated without CO dosing; instead, four O<sub>2</sub>/H<sub>2</sub> titrations were made, to facilitate desorption of carbon oxides if they are still present in the sample. The resulting (dashed) curve shows that some quantity of heavy gases evolves at high temperatures, but this quantity is negligibly small.

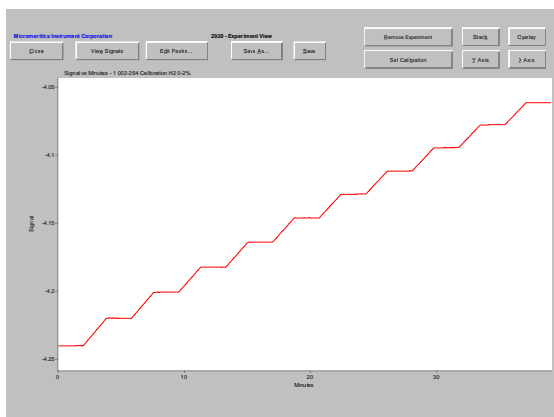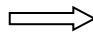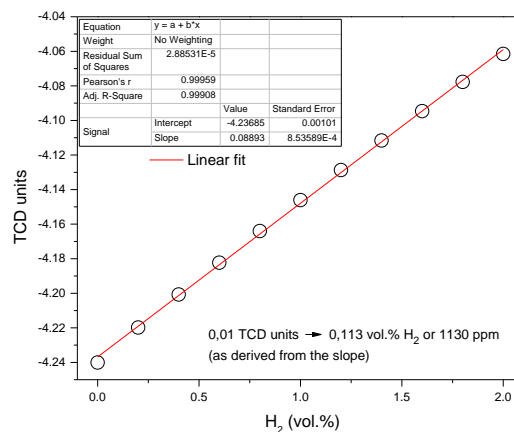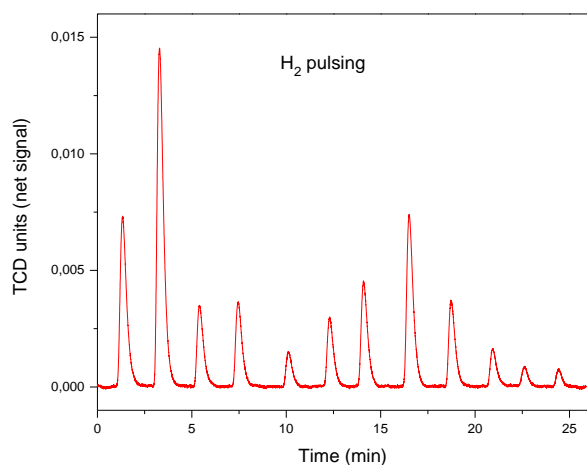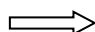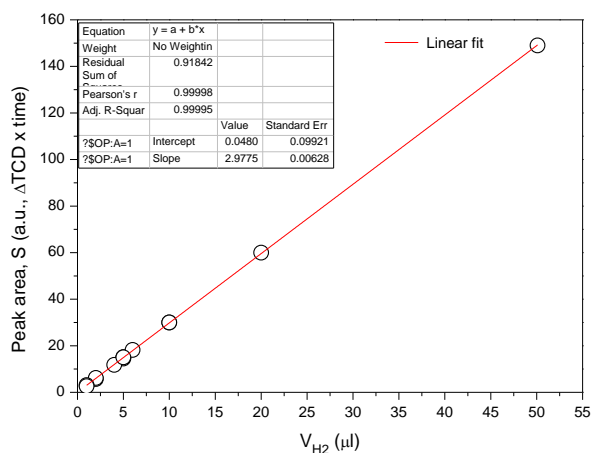

**Fig. S5.** Examples of calibration plots for H<sub>2</sub>. The upper panel at right shows TCD signal vs. concentration of H<sub>2</sub>, as found upon blending the flows of Ar and 2% H<sub>2</sub>-in-Ar at varying ratios (shown at left). The two lower panels relate to the case when small amounts of H<sub>2</sub> were injected into the carrier gas by syringe; in the panel at right, X axis represents the amount of H<sub>2</sub> dosed, and Y axis shows the corresponding peak area.

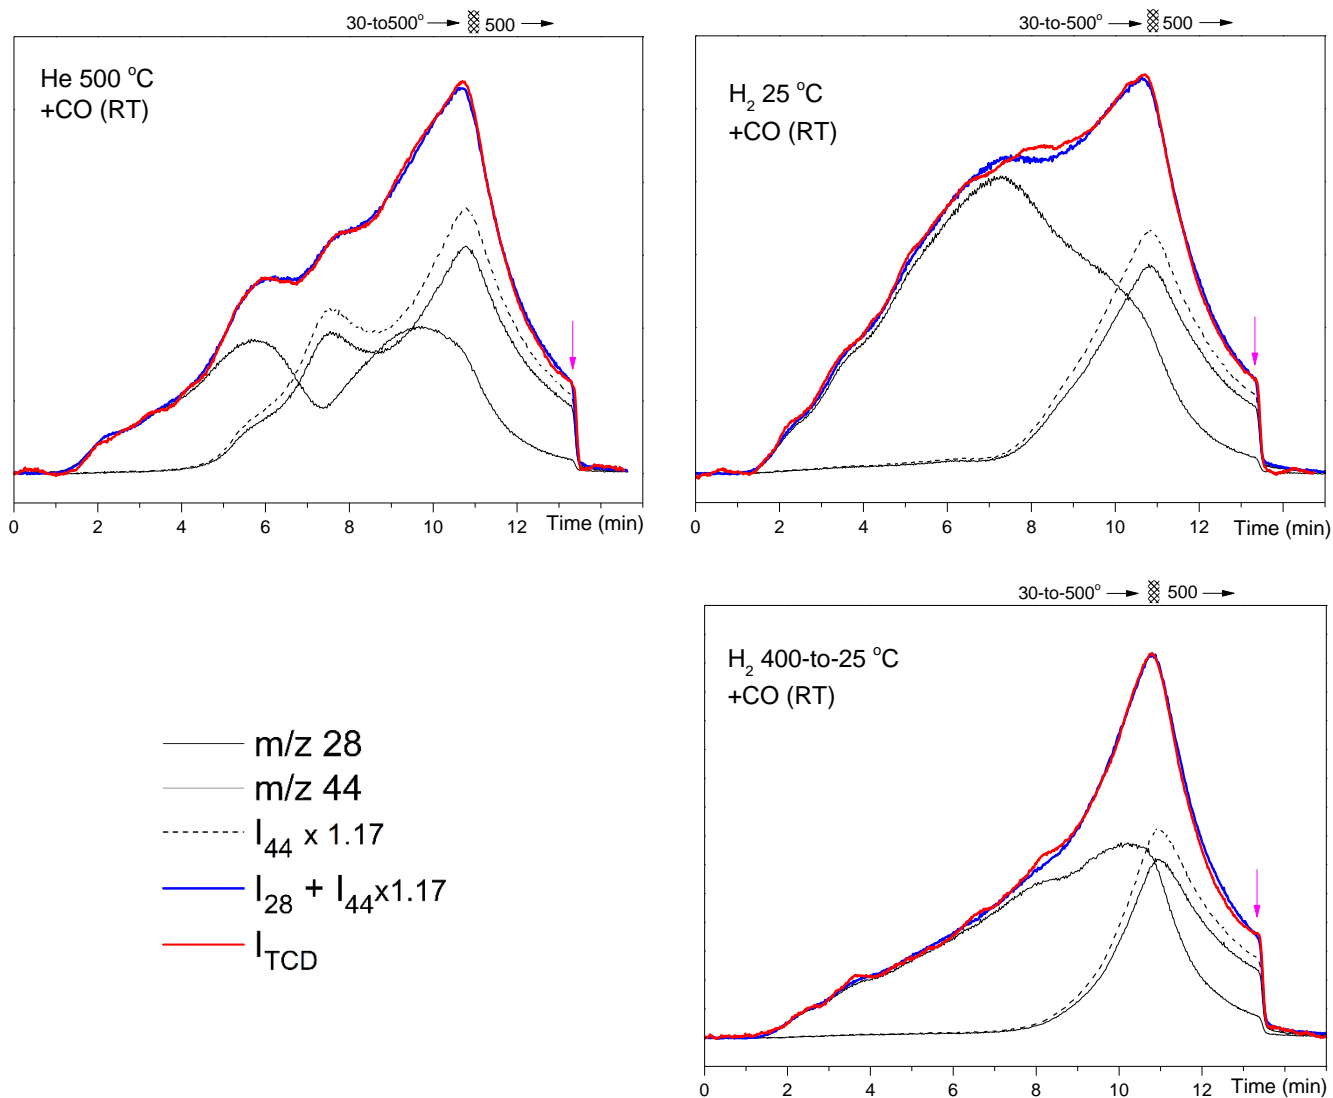

**Fig. S6.** Comparison of MS and TCD results for CO TPD from 0.5%Pt/ $\gamma$ -Al<sub>2</sub>O<sub>3</sub> sample pretreated at different conditions (specified in the panels). Solid black curves represent molar concentrations of desorbing CO and CO<sub>2</sub> in the He carrier gas at a time  $t$ , as found with MS using corresponding calibrations and accounting for the CO<sub>2</sub>-to-CO fragmentation. Blue curves show *an expected* response of TCD to the same gas mixtures; these curves were constructed by summation of the black curves (CO+CO<sub>2</sub>) with account of the higher sensitivity of TCD to CO<sub>2</sub> (by a factor of 1.17, as shown in the Table in part S4). Real curves recorded with TCD in these experiments are shown by red lines, and one can see excellent agreement between the red and blue curves.

To provide an easy comparison, TCD intensities were arbitrarily normalized, and MS curves were slightly shifted to left,  $\sim 7$  s, to compensate the longer time for the gas mixture to reach MS. Magenta arrows in the panels indicate the time when the carrier gas was directed to the detectors bypassing the sample, to check the baseline position.

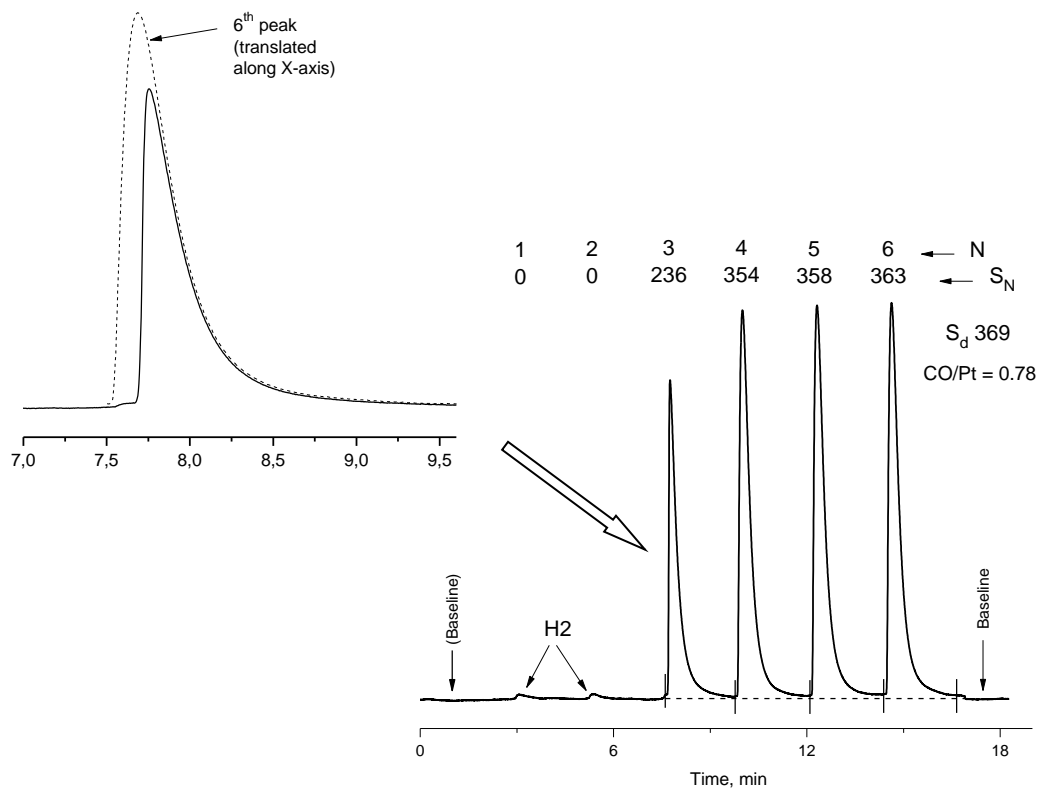

**Fig. S7.** Illustration of data treatment in CO pulse chemisorption measurements. The first two tiny peaks in the diagram relate to evolving H<sub>2</sub> and can be neglected, and the other peaks relate to unadsorbed CO. In the upper part of the figure (at left), the shape of the third peak is compared with that of the latest peak, and one can see that the first visible peak of CO looks like sharply truncated further peaks. This corresponds to the case of rapid adsorption. One can also see that the area of the sixth peak almost equals to that for the dose ( $S_d$ ).

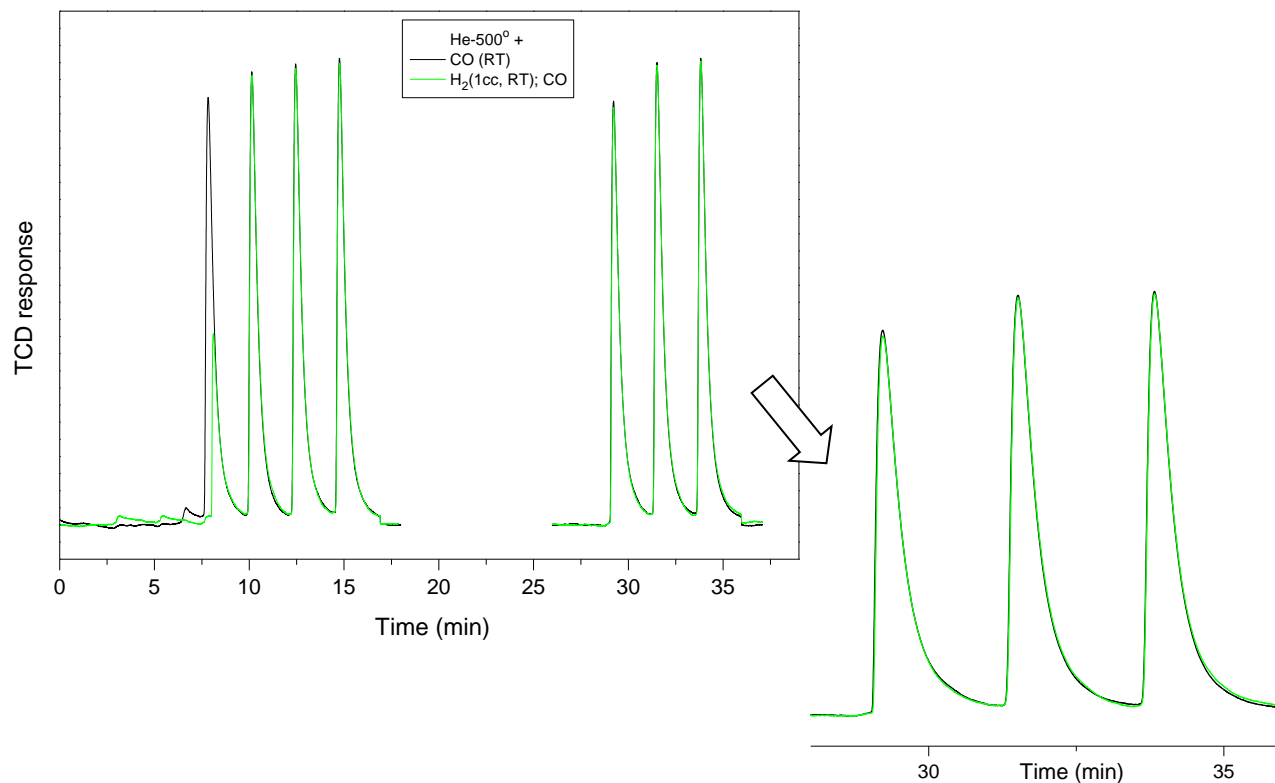

**Fig. S8.** Additional data for CO chemisorption on the preliminary degassed and on the H<sub>2</sub>-covered 0.5%Pt/ $\gamma$ -Al<sub>2</sub>O<sub>3</sub> (black and green curves, respectively; successive experiments with the same sample). Here, the samples were treated by six 72- $\mu$ l doses of CO and were then left under He carrier gas for 10 min, after which time three new doses of CO were provided.

Considering the peaks after the additional doses, one can see that the first peak is slightly smaller than the latter ones. This is due to desorption of weakly bonded CO for the time of holding in the carrier gas (3-4 rel% to all CO adsorbed), so that a part of CO from the new dose can be absorbed to replenish CO coverage. At the same time, the black and green peaks in this region practically coincide, thus indicating that both the samples behave similarly and the first six doses of CO were enough to saturate the samples.

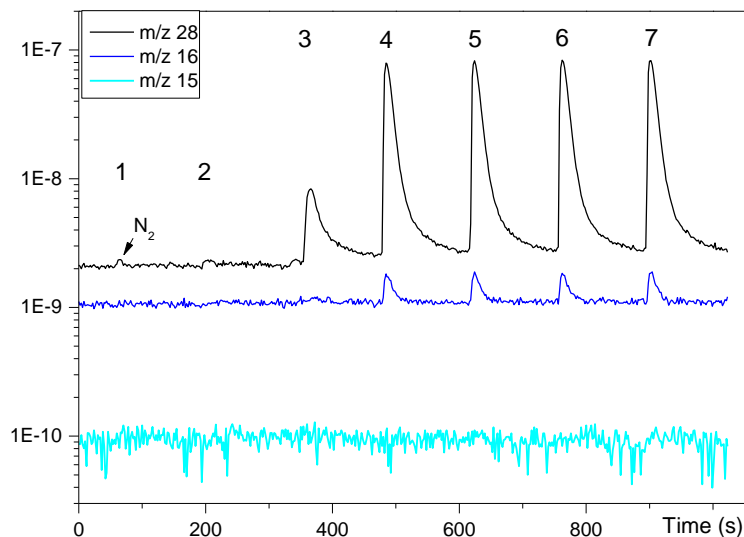

**Fig. S9.** MS data for CO pulse chemisorption on H<sub>2</sub>-pretreated 0.5%Pt/ $\gamma$ -Al<sub>2</sub>O<sub>3</sub>.

The barely perceptible peaks at  $m/z$  28 from the first two injections of CO relate to N<sub>2</sub> impurity in CO (note that Y axis in this panel is plotted on logarithmic scale and the content of N<sub>2</sub> is negligibly small as compared to CO). The signals at  $m/z$  16 results from CO fragmentation, but there are no visible  $m/z$  16 signals after the first two doses of CO (which were completely consumed by the sample). Neither there are visible  $m/z$  15 signals, which would signal for the formation of methane. (In mass spectrum of methane, the signals from CH<sub>4</sub><sup>+</sup> and its CH<sub>3</sub><sup>+</sup> fragment have similar intensities.)



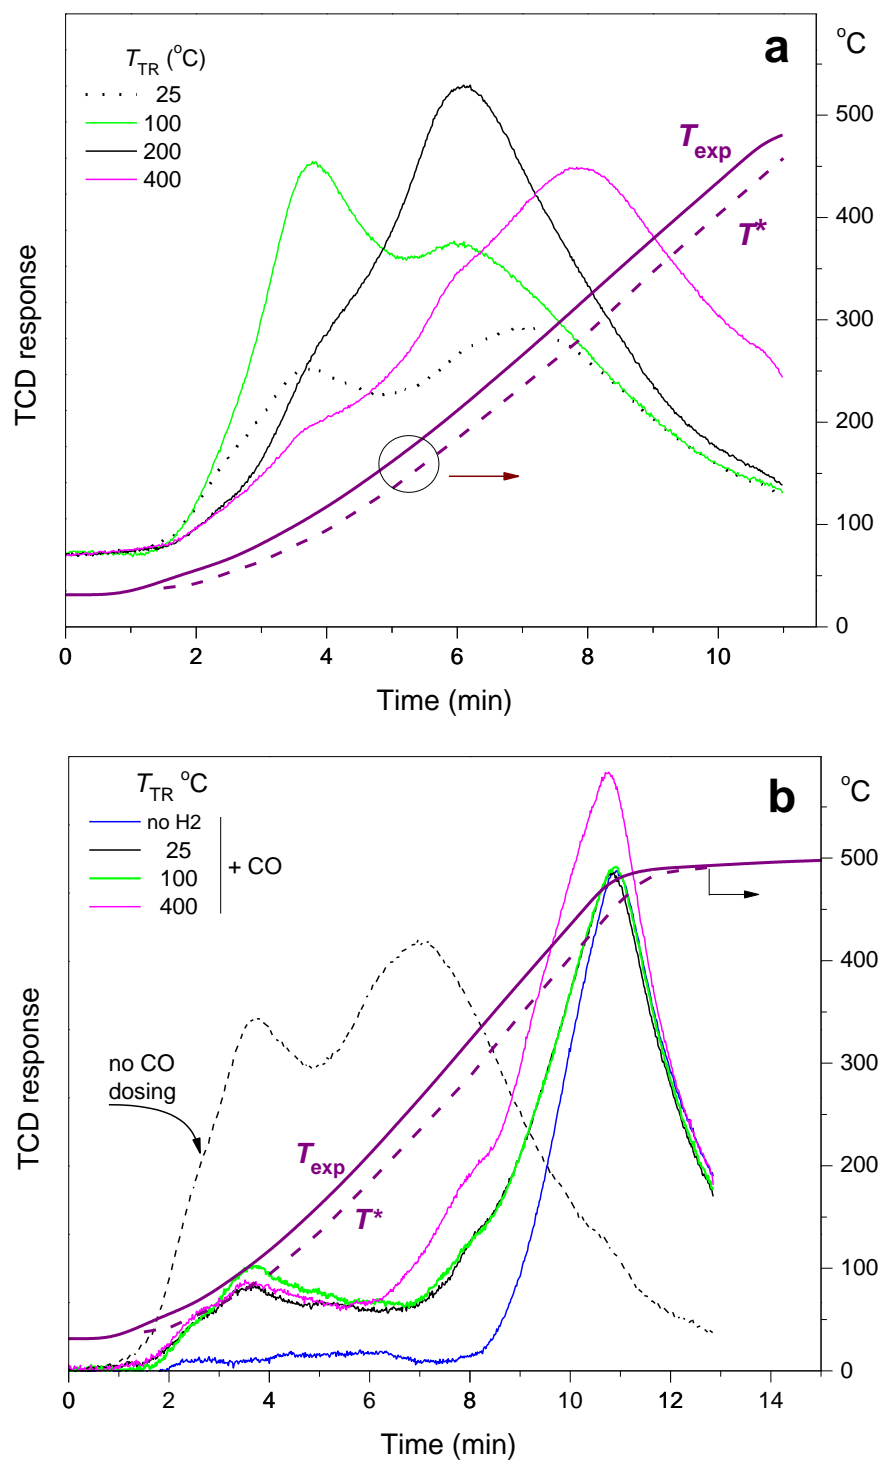

**Fig. S10.** Temperature-*vs*-time plots (purple lines) corresponding to TPD conditions in Fig. 4 in the main text (a) and in Fig. S15 (b).  $T_{exp}$  is the sample temperature at a time  $t$ , and  $T^*$  corresponds to the time of detector response (see explanation in section S4).

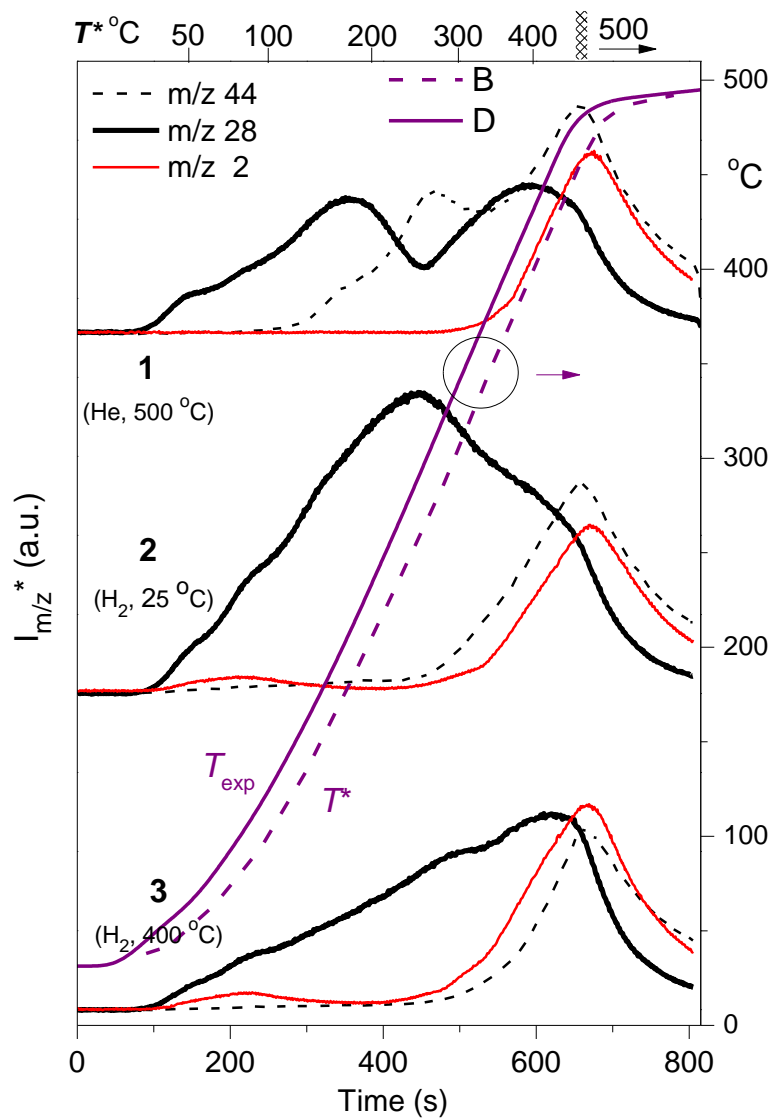

**Fig. S11.** Temperature-*vs*-time plots (purple lines) corresponding to TPD conditions in Fig. 5 in the main text.  $T_{\text{exp}}$  is the sample temperature at a time  $t$ , and  $T^*$  corresponds to the time of detector response (see explanation in section S4).

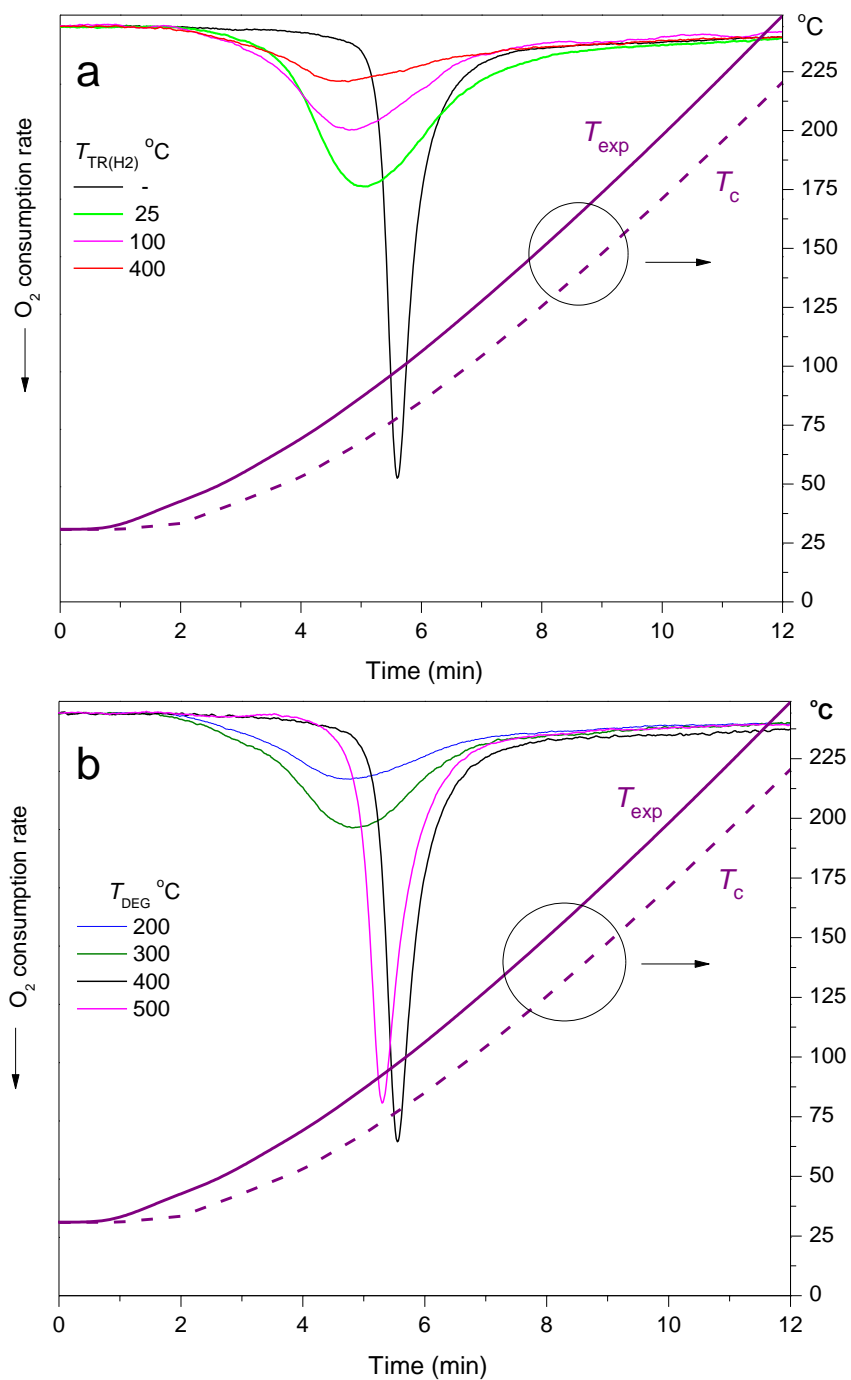

**Fig. S12.** Temperature-vs-time plots (purple lines) corresponding to TPO conditions in Fig. 7 in the main text.

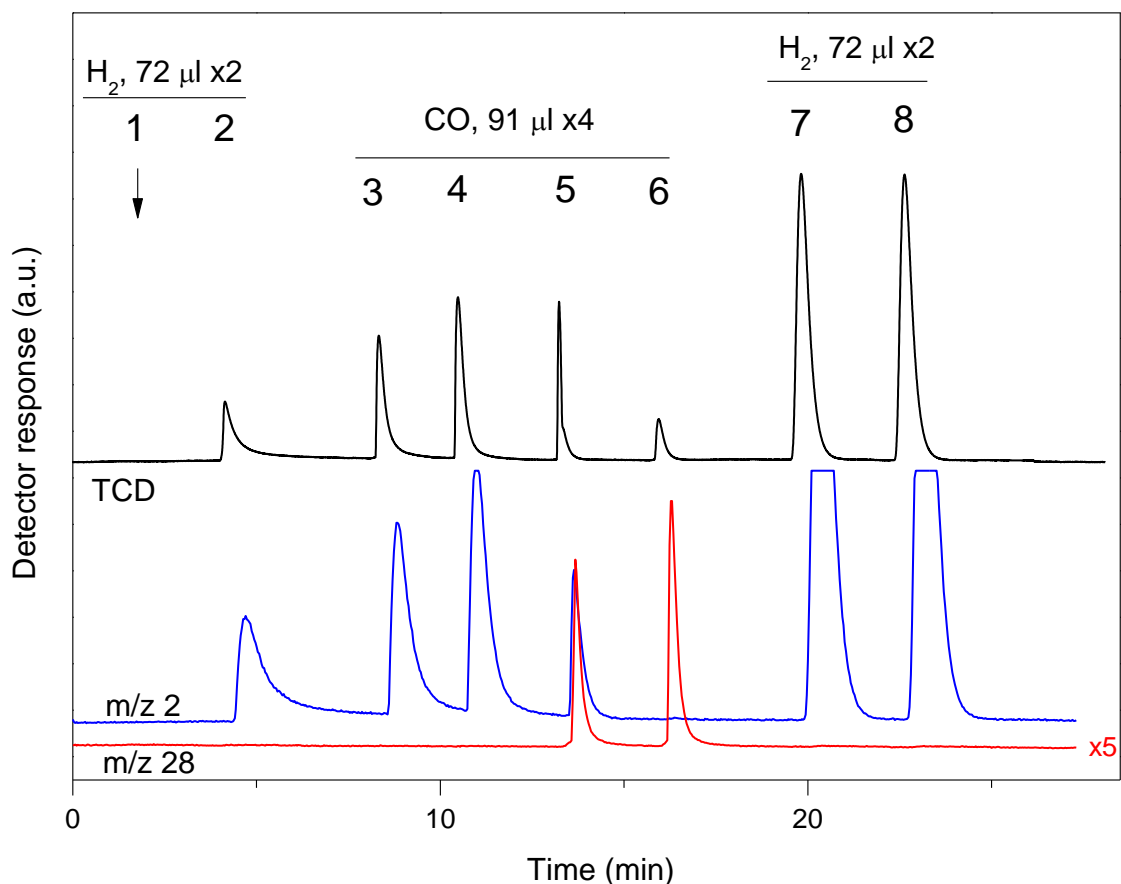

**Fig. S13.** An experiment on H<sub>2</sub>-by-CO displacement, with simultaneous monitoring of the process by TCD and MS. Here, Ar was used as the carrier gas, and the preliminary degassed 0.5%Pt/ $\gamma$ -Al<sub>2</sub>O<sub>3</sub> sample was consecutively treated by two doses of H<sub>2</sub>, four doses of CO, and (again) two doses of H<sub>2</sub>. The MS data show that there are only H<sub>2</sub> in the effluent gas after the first two doses of CO, and only CO (without H<sub>2</sub>) after the fourth dose of CO; moreover, MS detects no CO in the carrier gas after additional injections of H<sub>2</sub>. As measured with TCD (see Tables on the next page), the areas of peaks 7 and 8 (black curve) are equal and correspond to the dosing amount of H<sub>2</sub>. It follows that H<sub>2</sub> does not further adsorb on the (H<sub>2</sub>+CO) treated sample and does not displace the adsorbed CO, at least, in appreciable amounts.

Peak areas (TCD, a.u.), as found in the experiment in Fig. S13 (experiment 1) and in repeated experiment (2) when the sample was kept under the Ar carrier gas for a longer time. Total time in Ar before hydrogen chemisorption: 20 min (1) and 50 min (2).

| No. | Injections               | S (a.u.)                                                                                       |                                                                                                |
|-----|--------------------------|------------------------------------------------------------------------------------------------|------------------------------------------------------------------------------------------------|
|     |                          | Experiment 1                                                                                   | Experiment 2                                                                                   |
| 1   | H <sub>2</sub> , 72 μl   | 0 (H <sub>2</sub> unadsorbed)                                                                  | 0 (H <sub>2</sub> unadsorbed)                                                                  |
| 2   | H <sub>2</sub> , 72 μl   | 69 (H <sub>2</sub> unadsorbed)                                                                 | 59 (H <sub>2</sub> unadsorbed)                                                                 |
| 3   | CO, 91 μl                | 81 (H <sub>2</sub> displaced)                                                                  | 83 (H <sub>2</sub> displaced)                                                                  |
| 4   | CO, 91 μl                | 99 (H <sub>2</sub> displaced)                                                                  | 93 (H <sub>2</sub> displaced)                                                                  |
| 5   | CO, 91 μl                | 46 (ΣH <sub>2,displaced</sub> +CO <sub>unadsorbed</sub> )<br>26, for H <sub>2</sub> displaced* | 44 (ΣH <sub>2,displaced</sub> +CO <sub>unadsorbed</sub> )<br>24, for H <sub>2</sub> displaced* |
| 6   | CO, 91 μl                | 23.5 (CO)                                                                                      | 24.3 (CO)                                                                                      |
| 7   | H <sub>2</sub> , 72 μl** | 245                                                                                            | 244                                                                                            |
| 8   | H <sub>2</sub> , 72 μl** | 245                                                                                            | 243                                                                                            |

\*As found with account of the S<sub>5</sub>/S<sub>6</sub> ratio for m/z 28.

\*\*S<sub>0</sub> value for such a dose corresponds to 244±1 units, as found using an empty tube, before and after these experiments.

From the data in the Table above and with account of sample mass (here, 408 mg) we have:

|                                              | Experiment 1 | Experiment 2 |
|----------------------------------------------|--------------|--------------|
| H <sub>adsorbed</sub> /Pt* (atomic ratio)    | 1.04         | 1.06         |
| H <sub>CO-displaced</sub> /Pt (atomic ratio) | 0.512        | 0.495        |
| CO <sub>ads</sub> /Pt                        | 0.893        | 0.894        |

The difference between the results of these two experiments can be considered negligible, thus confirming that the content of O<sub>2</sub> impurities in the carrier gas is too small to affect the results.

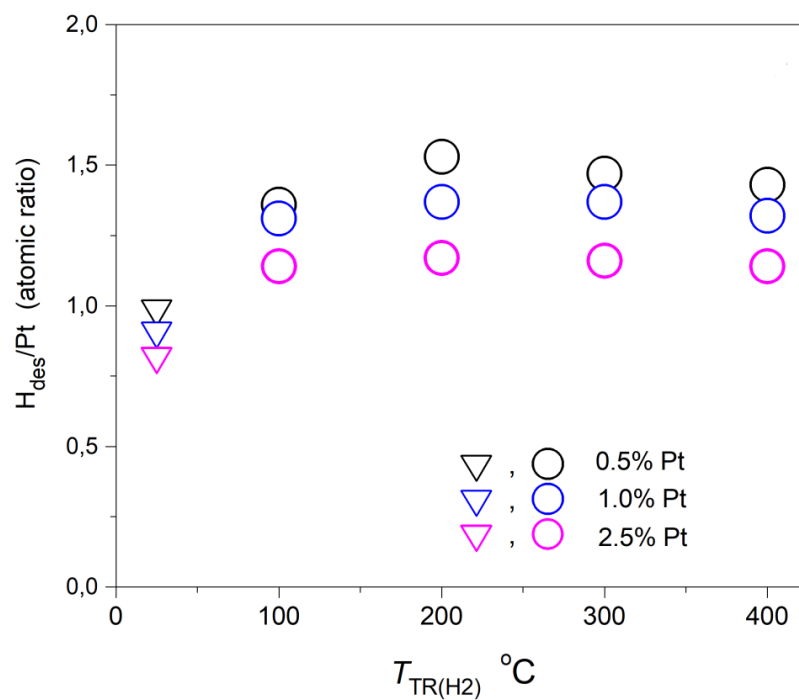

**Fig. S14.** The amounts of H<sub>2</sub> desorbed in TPD runs from Pt/γ-Al<sub>2</sub>O<sub>3</sub> samples with different Pt loading, in dependence on H<sub>2</sub>-pretreatment temperature (H<sub>2</sub> pulsing at 25 °C and flowing H<sub>2</sub> in the other cases). The H<sub>des</sub>/Pt values were calculated from the data in ref. S2 and include hydrogen that was evolved during sample heating to 500 °C plus isothermal hold for 3 min at final temperature.

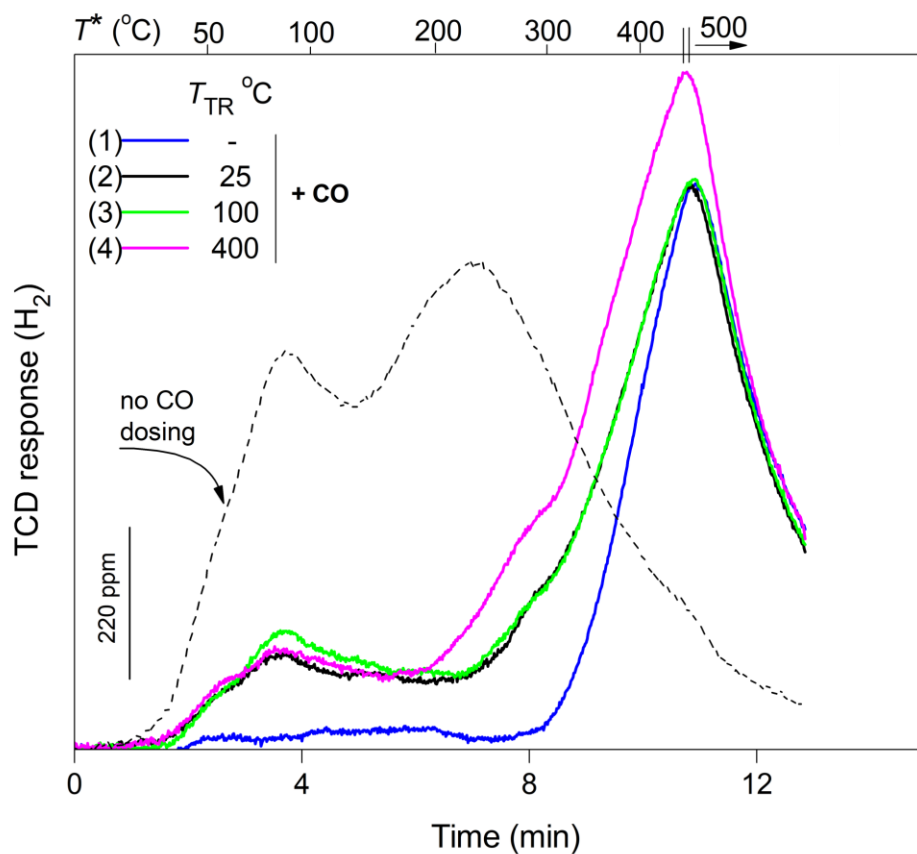

**Fig. S15.** TCD data for H<sub>2</sub> TPD from 0.5%Pt/ $\gamma$ -Al<sub>2</sub>O<sub>3</sub> after room-temperature CO chemisorption on preliminarily degassed sample (1) and on H<sub>2</sub>-pretreated sample (2-4). For comparison, the dashed curve from Fig. 4, corresponding to  $T_{TR(H_2)}$  of 25 °C without further CO treatment, is also provided. Ar was used as the carrier gas, and the weak signals at the low and moderate temperatures in case 1 (blue curve) relate exclusively to heavy gases, CO/CO<sub>2</sub> (as checked with MS).

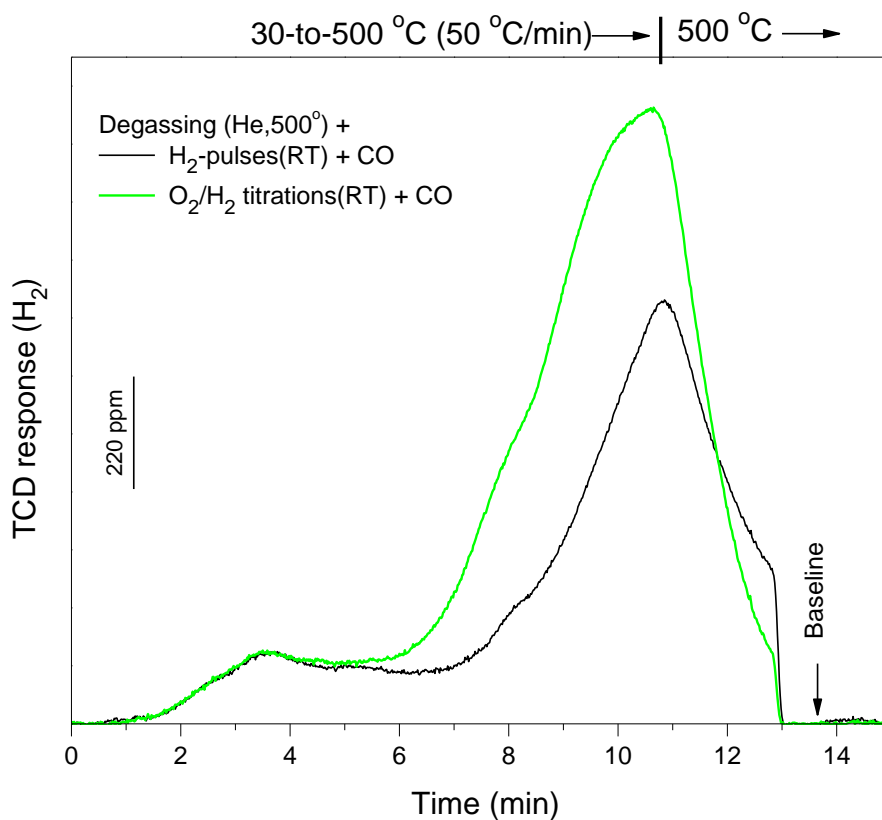

**Fig. S16.** H<sub>2</sub> TPD runs under standard conditions (black curve) and in the presence of a small amount of H<sub>2</sub>O generated through O<sub>2</sub>/H<sub>2</sub> titrations (green curve). In the latter case, the 0.5%Pt/γ-Al<sub>2</sub>O<sub>3</sub> sample was degassed and then treated at room temperature in the following order: H<sub>2</sub>→He→O<sub>2</sub>(pulses)→H<sub>2</sub>(5min)→He(7 min)→CO(pulses).



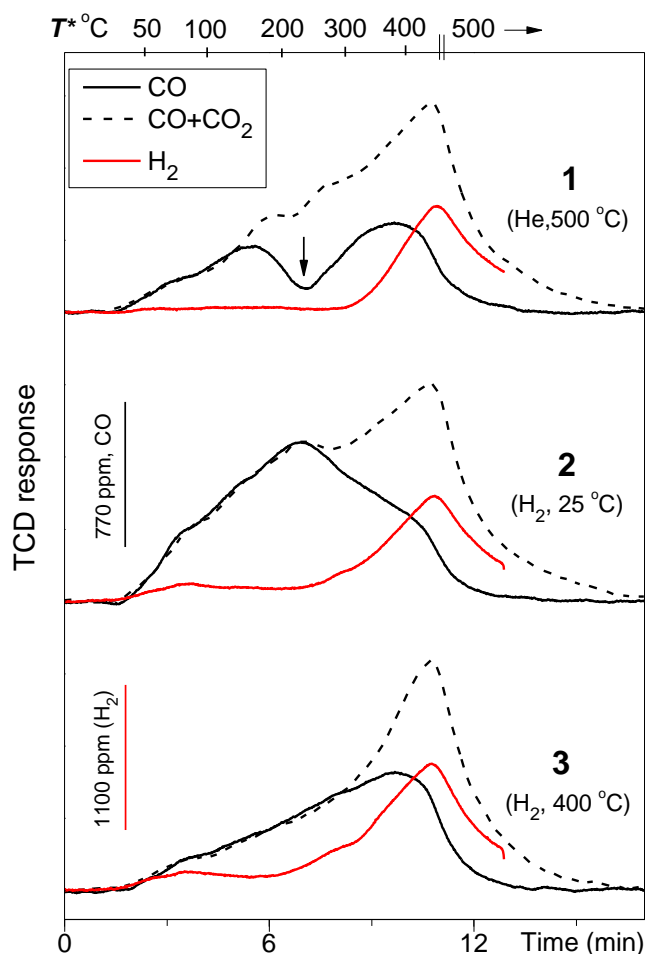

**Fig. S17.** Experiments as in Fig. 5 in the main text but using TCD. Ar as the carrier gas for detecting H<sub>2</sub> and He for CO and CO<sub>2</sub>. The black dashed curves were recorded with trapping only H<sub>2</sub>O (170 K), and the detector reacted both to CO and CO<sub>2</sub>. The black solid curves were recorded with trapping CO<sub>2</sub> at 77 K; to compensate the longer retention time in this case (for the gas mixture on the way to detector), the original CO-TPD curves were slightly shifted along X-axis to left, by 0.7 min. The Table below lists the amounts of CO<sub>2</sub> accumulated in the trap, along with CO adsorption/desorption data for these runs.

| Treatment before CO adsorption | CO <sub>ads</sub> /Pt | CO <sub>ads</sub><br>μmol | CO <sub>des</sub><br>μmol | CO <sub>2,des</sub><br>μmol | CO <sub>des</sub> +CO <sub>2,des</sub><br>μmol |
|--------------------------------|-----------------------|---------------------------|---------------------------|-----------------------------|------------------------------------------------|
| He, 500 °C                     | 0.66                  | <b>7.0</b>                | 3.1                       | 3.1                         | <b>6.2</b>                                     |
| H <sub>2</sub> , 25 °C         | 0.85                  | <b>8.9</b>                | 5.7                       | 2.4                         | <b>8.1</b>                                     |
| H <sub>2</sub> , 400 °C        | 0.61                  | <b>6.4</b>                | 4.2                       | 1.9                         | <b>6.1</b>                                     |

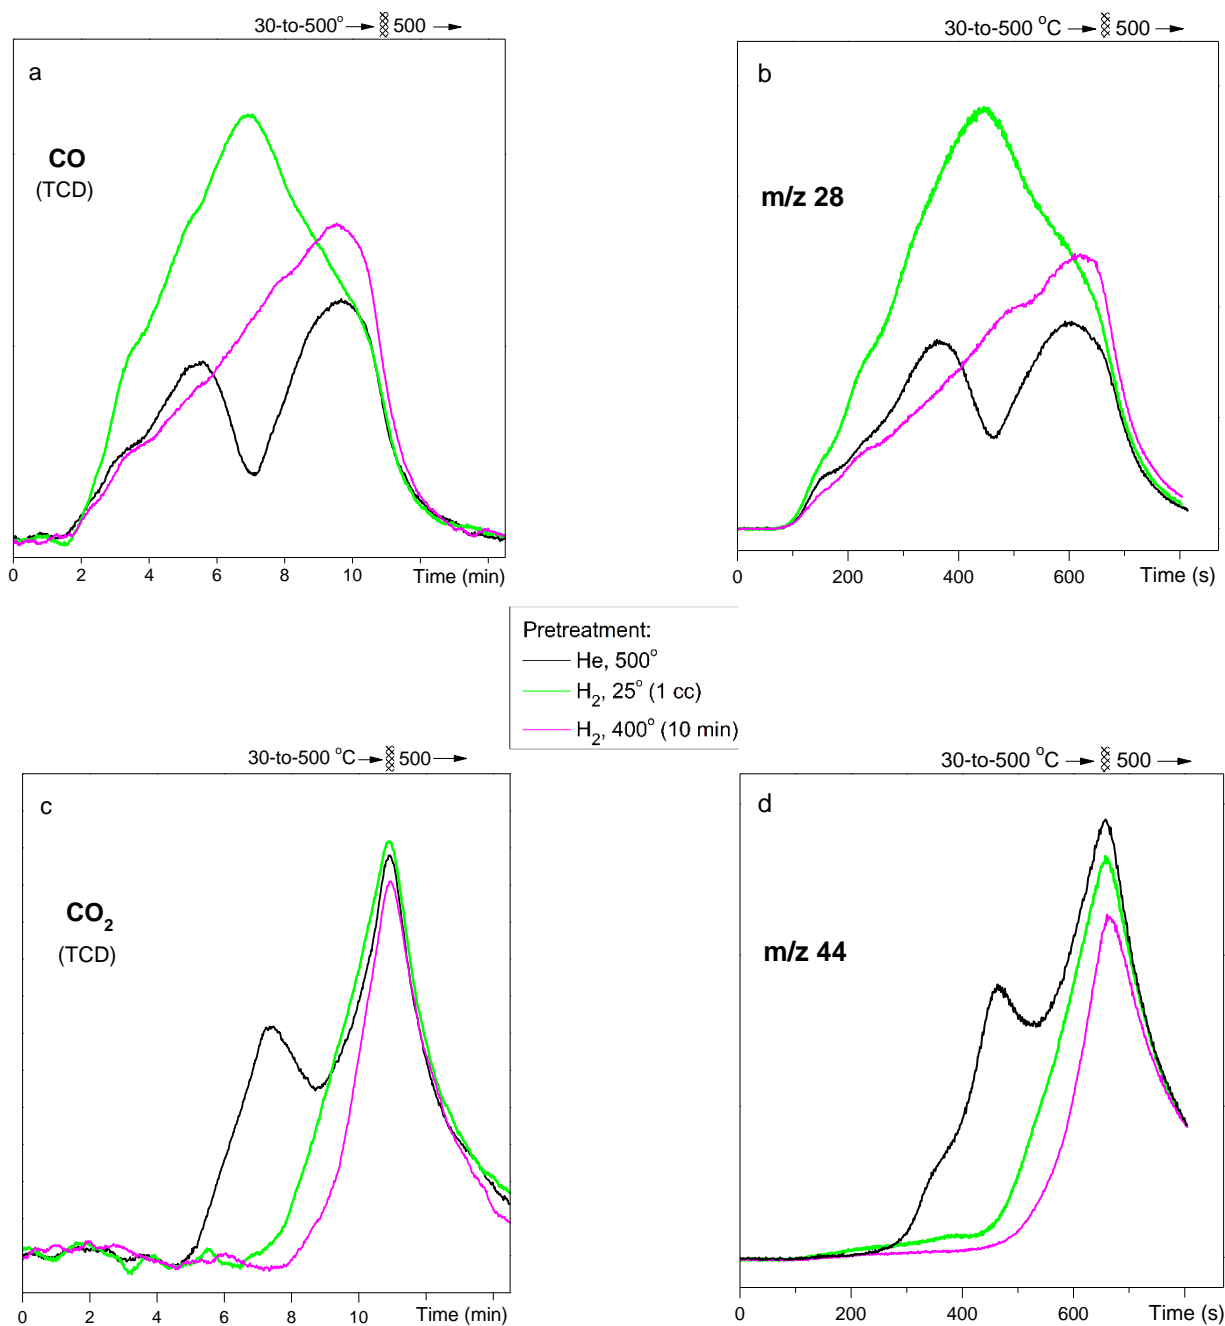

**Fig. S18.** CO/CO<sub>2</sub> curves from Fig. S17 (a, c) and from Fig. 5 in the main text (b, d), as grouped accordingly to desorbing gas. The curves in (c) represent difference curves that were obtained by subtraction of solid black curves in Fig. S17 from corresponding dashed black curves.

The experiments with TCD and mass-spectrometry detections were performed at different times, and the difference between the curves at left and right is mainly due to this factor.

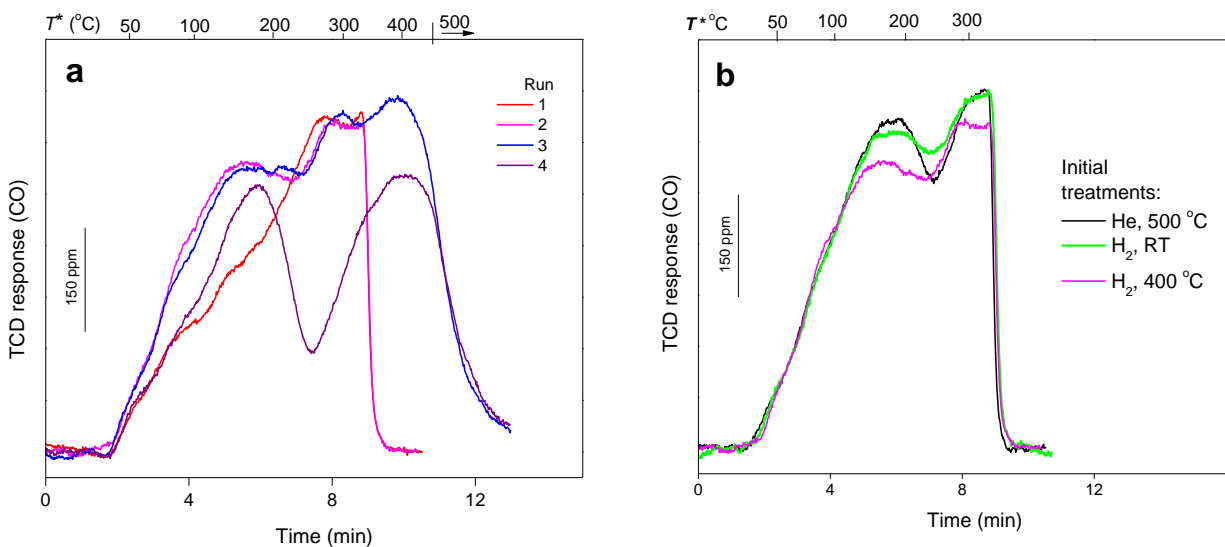

**Fig. S19.** Supplementary data to Fig. 6b in the main text.

(a) Successive CO-TPD runs with the sample that was initially treated under  $H_2$  at  $T_{TR(H_2)}$  of 400 °C. Run 3 was conducted with heating the sample up to 500 °C, and run 4 was performed after annealing the sample at that temperature (after run 3, the sample was kept under the carrier gas at 500 °C for 15 min).

(b) CO-TPD traces recorded in the *second* runs for the samples that differ in conditions of initial treatments.

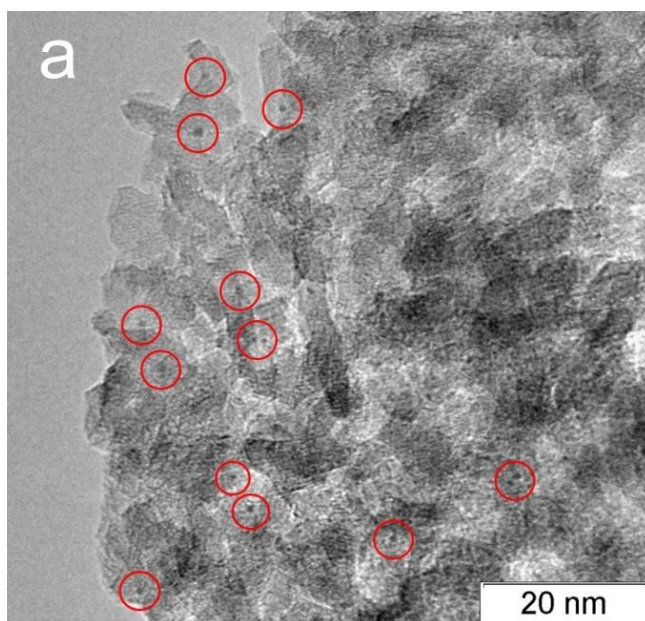

**Fig. S20.** Characteristic TEM image of 0.5%Pt/ $\gamma$ - $Al_2O_3$  after 18 TPO runs, including the two series of experiments in Fig. 7 in the main text. For clarity, some of the Pt clusters are marked by red circles.

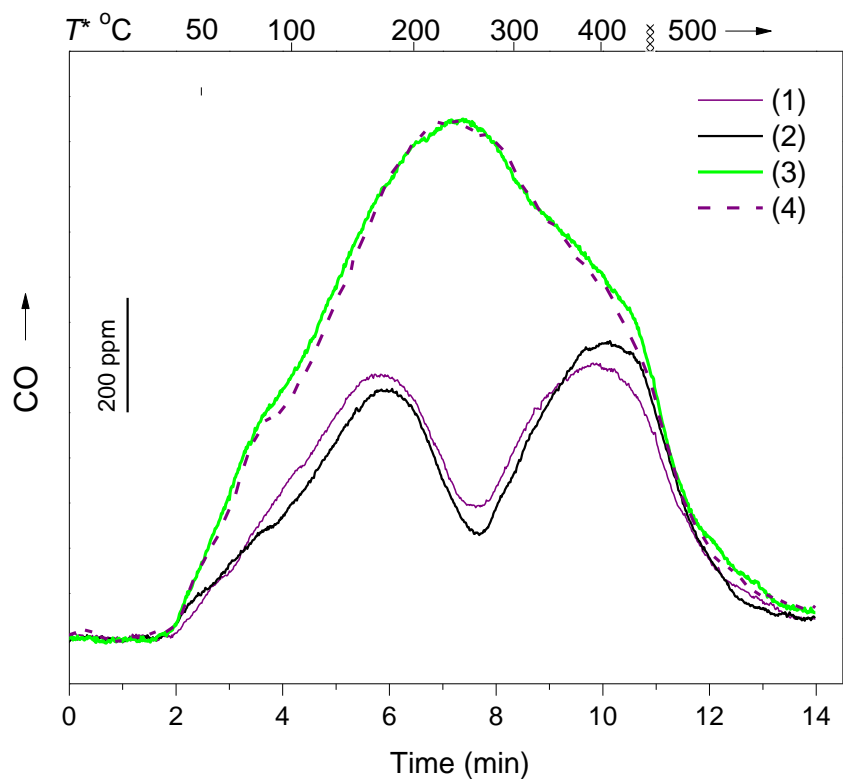

**Fig. S21.** Supplementary data to Fig. 8 in the main text. Purple curves (1 and 4) are the same as curves 1 and 4 in Fig. 8; here they are compared with CO-TPD curves for H<sub>2</sub>-untreated sample (2) and for the sample that was treated with H<sub>2</sub> *before* CO dosing (3).

Sequence and conditions of treatments after sample degassing:

- (1) CO (six 72- $\mu$ l doses); H<sub>2</sub> (1-cc pulse, 15 s after the last CO pulse).
- (2) CO (six 72- $\mu$ l doses).
- (3) H<sub>2</sub> (a flow, 5 min); CO (six 72- $\mu$ l doses, 5 min after H<sub>2</sub> treatment).
- (4) CO (six 72- $\mu$ l doses); H<sub>2</sub> (a flow, 5 min); CO (three 72- $\mu$ l doses, 5 min after H<sub>2</sub> treatment).

All pretreatments at room temperature.

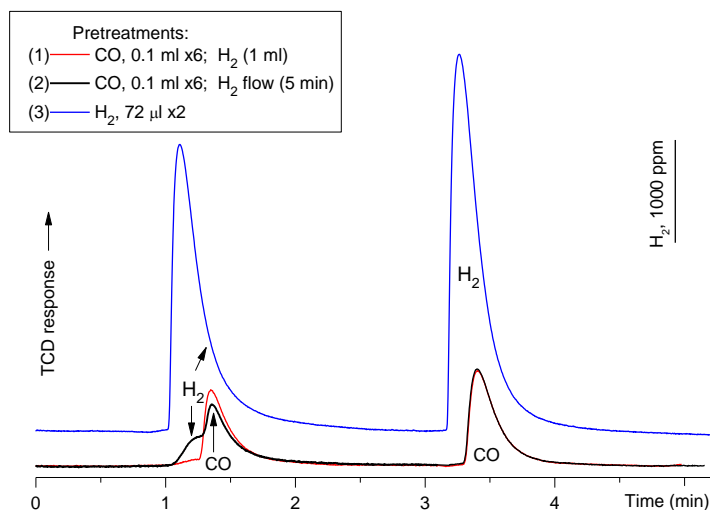

**Fig. S22.** H<sub>2</sub> displacement by 0.1-ml pulses of CO from 0.5%Pt/ $\gamma$ -Al<sub>2</sub>O<sub>3</sub> sample. The upper (blue) curve relates to sample that was degassed and then treated only with H<sub>2</sub>, and the two lower curves correspond to the case when H<sub>2</sub> treatment was given to CO-covered sample. Five minutes intervals were inserted between the CO-H<sub>2</sub>-CO treatments. The data show that only a long treatment of CO-covered sample in flowing H<sub>2</sub> affords an appreciable (but very small) quantity of H<sub>2</sub> that can be further displaced by CO.

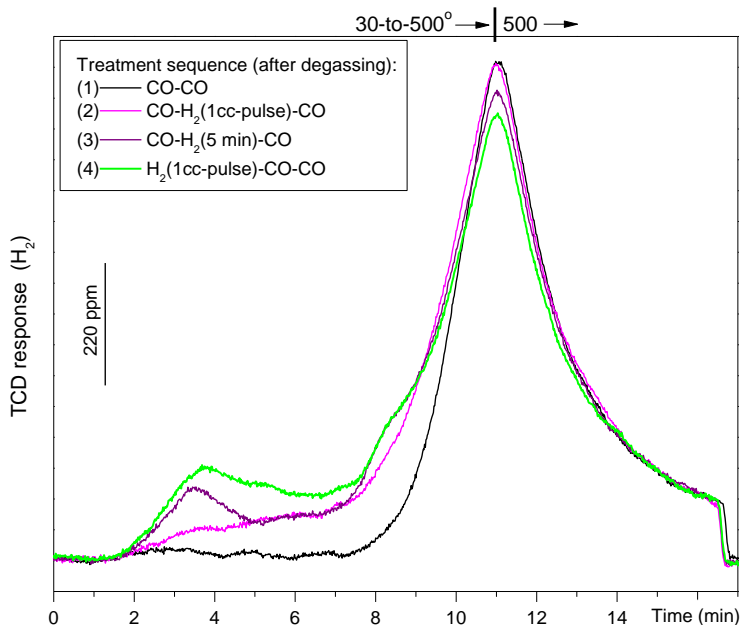

**Fig. S23.** H<sub>2</sub>-TPD curves of 0.5%Pt/ $\gamma$ -Al<sub>2</sub>O<sub>3</sub> sample after treating it with H<sub>2</sub> and CO in different order. Here, CO was dosed in two steps: first, six 72- $\mu$ l pulses of CO were made, and 10 min later three new doses were delivered. Hydrogen was provided before CO dosing (case 4) or between the first and last CO doses (curves 2 and 3). In case 1, H<sub>2</sub> treatment was omitted.

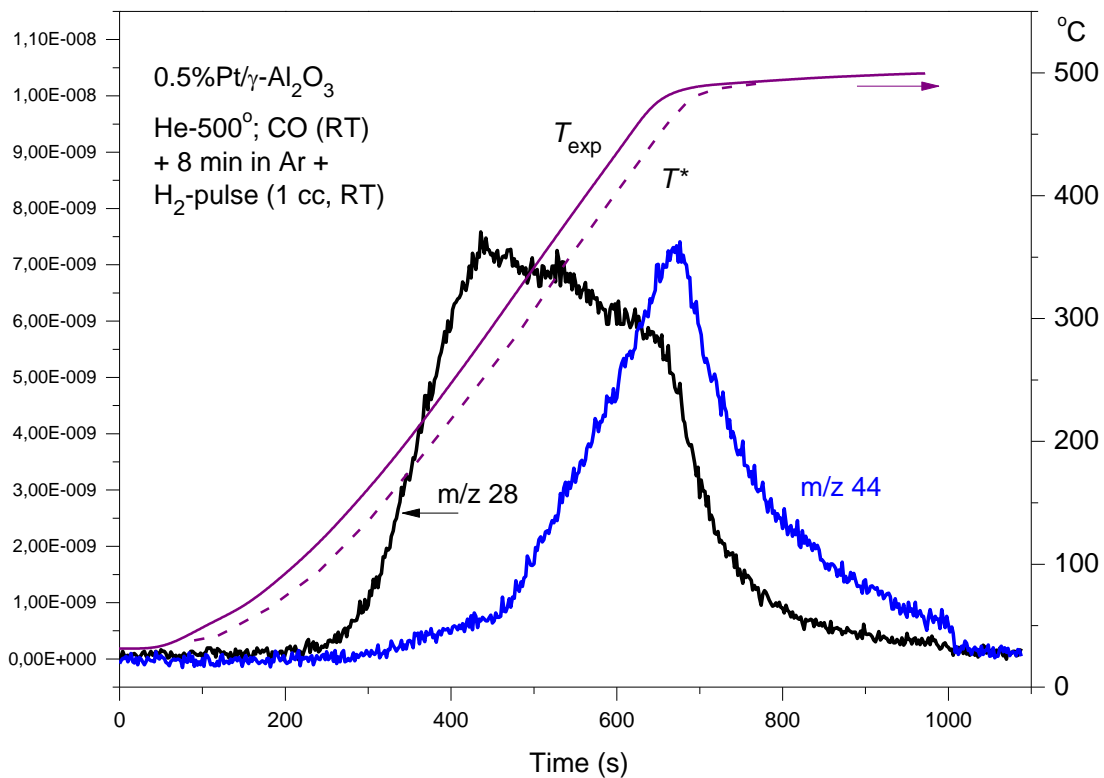

**Fig. S24.** MS data relevant to Fig. 8 in the main text. Here, the CO-covered sample was left under the carrier gas for 8 min, and 1-cc pulse of H<sub>2</sub> was then provided. Black curve shows CO TPD trace and blue curve shows CO<sub>2</sub> trace (the trap was at 170 K).

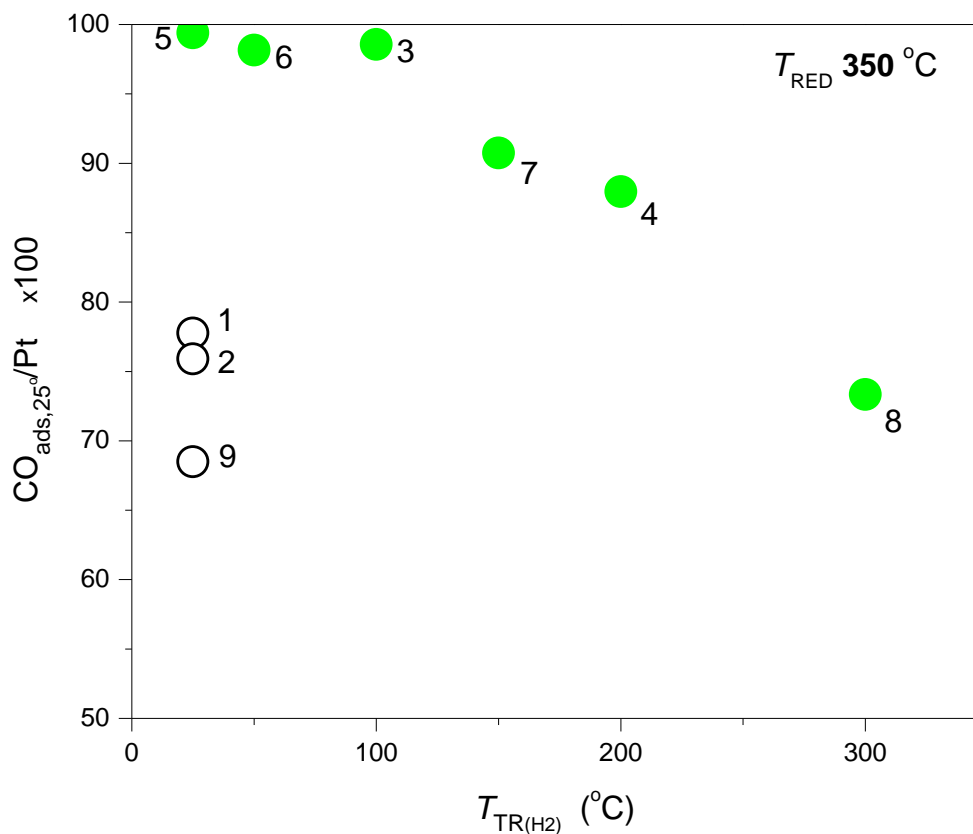

**Fig. S25.** CO pulse chemisorption data for 0.5%Pt/ $\gamma$ -Al<sub>2</sub>O<sub>3</sub> sample that was initially reduced at 350 °C (90 min). Following these experiments, the sample was treated in flowing H<sub>2</sub> at 500 °C for 30 min, and a new series of experiments, presented in Fig. 1b in the main text, was performed.

The trends in this figure are similar to those in Fig. 1b, but one can notice that the freshly reduced sample in Fig. S25 demonstrates somewhat lower stability during successive runs as compared to the stabilized sample in Fig. 1b.

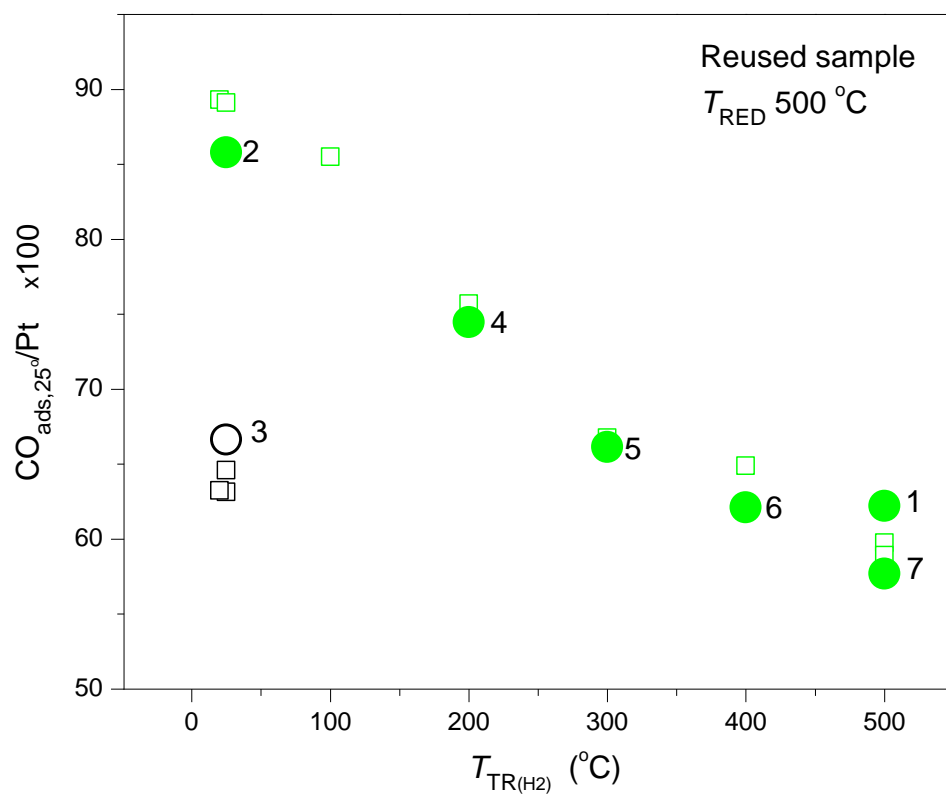

**Fig. S26.** Repeated testing of 0.5%Pt/ $\gamma$ -Al<sub>2</sub>O<sub>3</sub> sample. After the experiments in Fig. 1b in the main text, the sample tube was disconnected from the instrument and the sample was stored for about a year. It was then reoxidized at 500 °C and rereduced at 500 °C. The data from Fig. 1b are also provided for comparison (small squares).



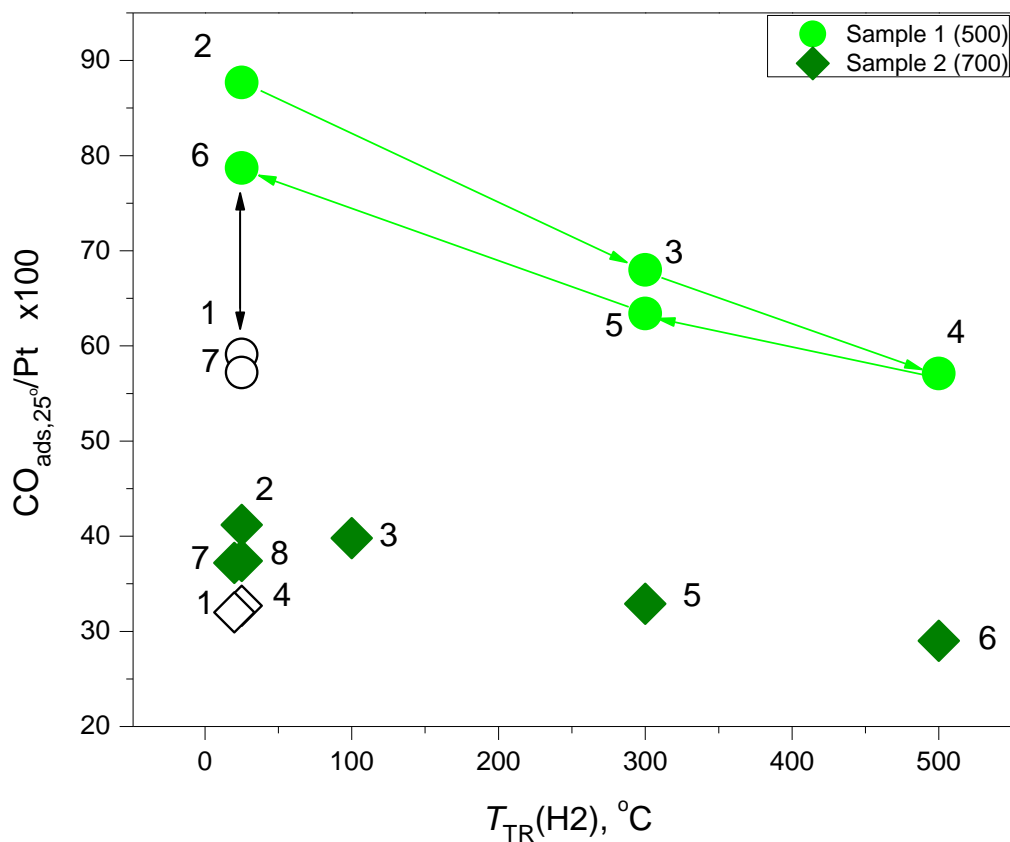

**Fig. S27.** Comparative experiments with a 0.43%Pt/ $\gamma$ -Al<sub>2</sub>O<sub>3</sub> catalyst representing Russian analog of EUROPt-3 standard catalyst (courteously granted by Dr V.B. Goncharov from our Institute). The catalyst was produced in extruded form and was earlier reduced in small quantities at 500 and 700 °C (sample 1 and 2, respectively). Before these experiments, the extrudates were gently crushed in a mortar, and the resulting samples (by 400 mg each) were reoxidized (O<sub>2</sub>, 300 °C, 30 min) and rereduced (H<sub>2</sub>, 300 °C, 30 min) in situ. The numbers near the symbols show the sequence order of the measurements; open symbols refer to degassed samples.

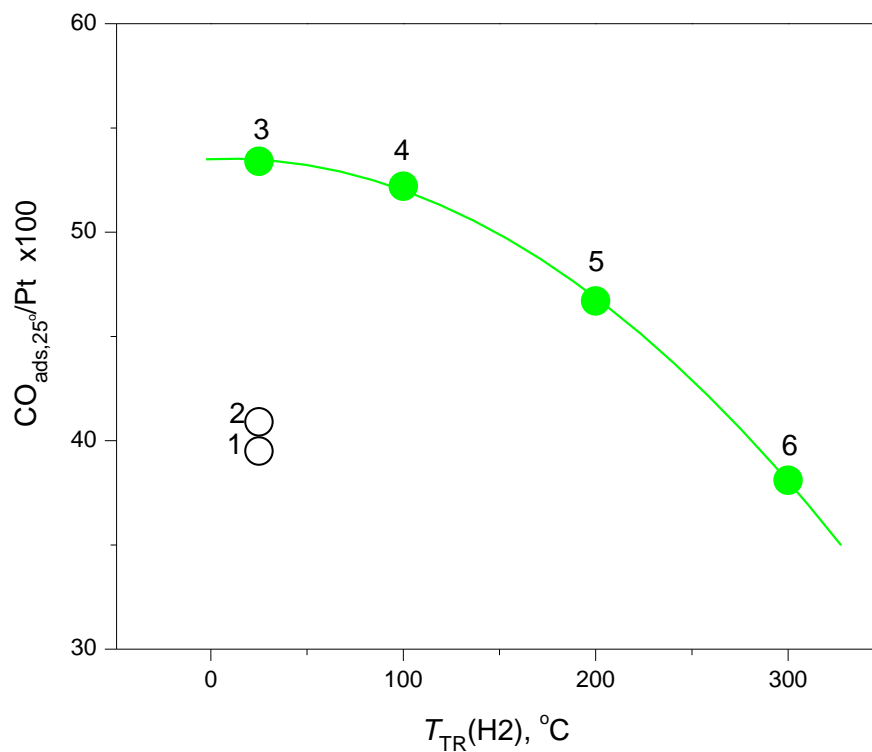

**Fig. S28.** Comparative experiments with a Cl-free 0.6%Pt/ $\gamma$ -Al<sub>2</sub>O<sub>3</sub> catalyst (courteously provided by Dr E.V. Kovalev from our Institute). The sample was prepared with the use of Pt acetylacetonate and home-made support and was previously used in experiments on CO oxidation. Before the chemisorption measurements, the sample was re-oxidized (O<sub>2</sub>, 300 °C, 30 min) and re-reduced (H<sub>2</sub>, 300 °C, 30 min) in situ. The numbers near the symbols show the sequence order of the measurements; black open symbols refer to degassed sample.

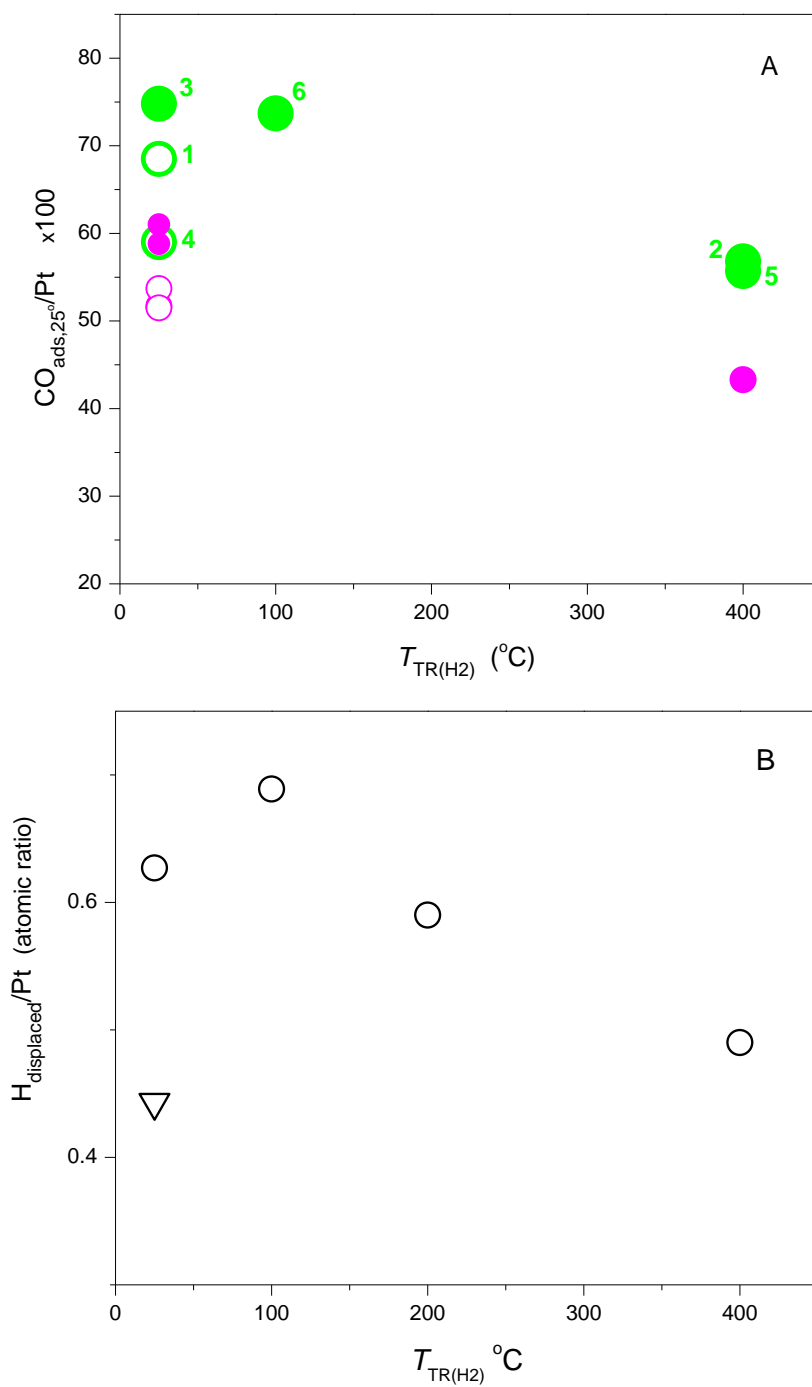

**Fig. S29.** CO pulse chemisorption (A) and H<sub>2</sub>-by-CO displacement data (B) for Pt/γ-Al<sub>2</sub>O<sub>3</sub> sample with a high Pt loading (2.5 wt%). In panel A, green symbols shows a series started with freshly reduced sample, and magenta symbols refer to aged sample (after two different series, with storage, reoxidation, and rereduction). In panel B, triangle stands for pretreatment by H<sub>2</sub> pulses and circles for pretreatments in a flow of H<sub>2</sub>.

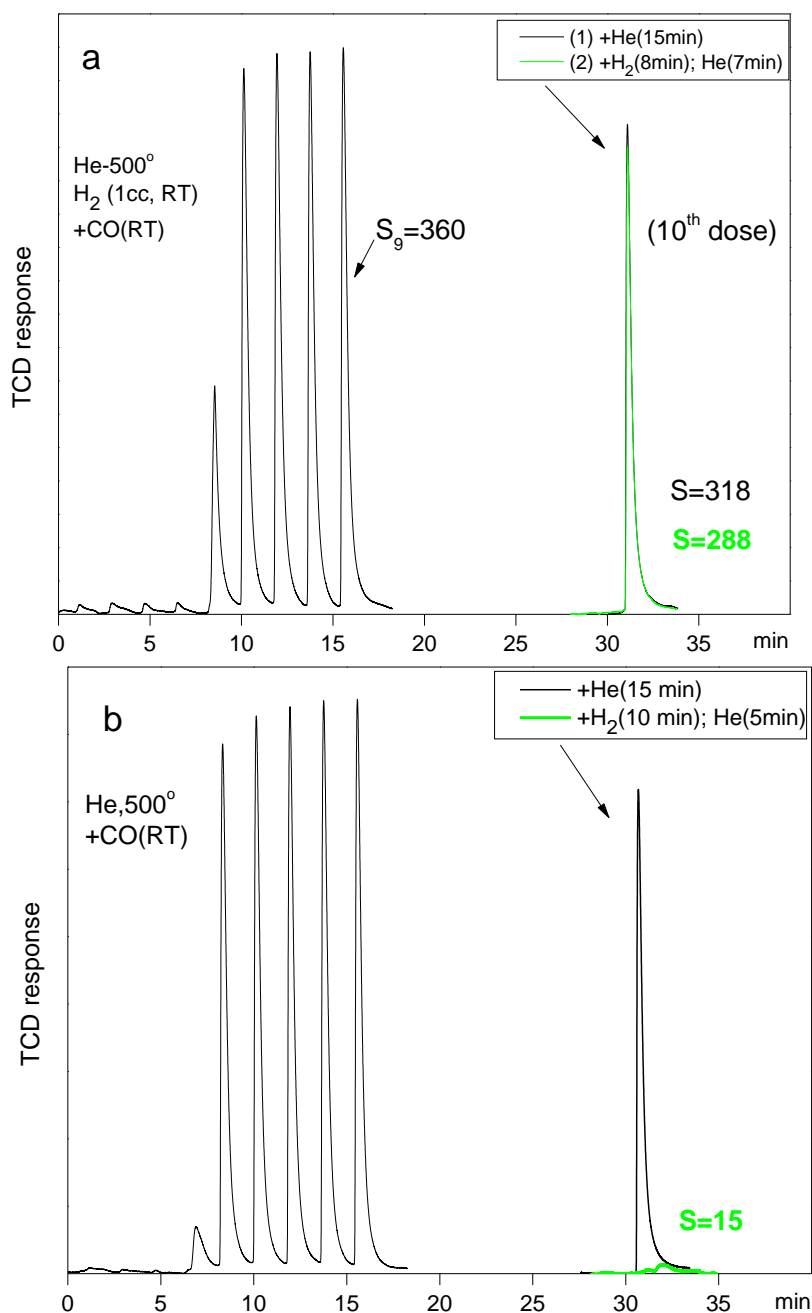

**Fig. S30.** CO chemisorption results for 2.5%Pt/ $\gamma$ -Al<sub>2</sub>O<sub>3</sub> sample (200 mg), which was preliminary treated with H<sub>2</sub> (a) or used directly after degassing (b). Following the injection of nine 72- $\mu$ l doses of CO, the sample was left for 15 min under the He carrier gas or under a flow of H<sub>2</sub>, and a new dose of CO was then provided. S values near the 10<sup>th</sup> peak show peak areas (a.u.). One can notice that the sample in (a) adsorbs small amounts of CO from the 10<sup>th</sup> dose, but the intermediate H<sub>2</sub> treatment in case (b) results in almost complete consumption of the 10<sup>th</sup> CO dose.

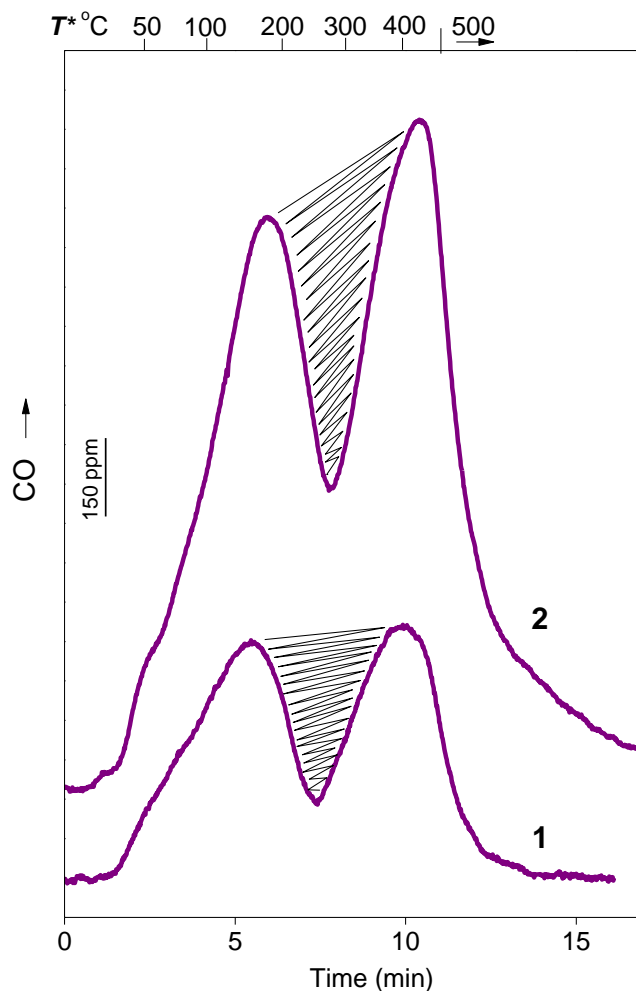

**Fig. S31.** CO TPD from fresh Pt/ $\gamma$ -Al<sub>2</sub>O<sub>3</sub> samples after degassing and CO chemisorption. Pt loading 0.5 wt% (1) and 2.5 wt% (2); sample mass 400 mg (1) and 200 mg (2). During TPD runs, CO<sub>2</sub> was trapped at 77 K.

Note that the mass of 2.5%Pt/ $\gamma$ -Al<sub>2</sub>O<sub>3</sub> sample is twice as small as that of 0.5%Pt/ $\gamma$ -Al<sub>2</sub>O<sub>3</sub> but the dip in CO desorption rate is larger, in proportion to the amount of Pt (10 and 25  $\mu$ mol in cases 1 and 2, respectively), not to the amount of the support. The area of the hatched fragments corresponds to 0.7 (1) and 1.5 (2)  $\mu$ mol CO.

| Sample   | CO <sub>ads</sub> /Pt | CO <sub>ads</sub><br>$\mu$ mol | CO <sub>des</sub><br>$\mu$ mol | CO <sub>2,des</sub> *<br>$\mu$ mol | CO <sub>des</sub> +CO <sub>2,des</sub><br>$\mu$ mol |
|----------|-----------------------|--------------------------------|--------------------------------|------------------------------------|-----------------------------------------------------|
| <b>1</b> | 0.75                  | 7.6                            | 3.8                            | 3.6                                | 7.4                                                 |
| <b>2</b> | 0.68                  | 17.3                           | 11.5                           | 5.7                                | 17.2                                                |

\*As measured after accumulating in the trap at 77 K.

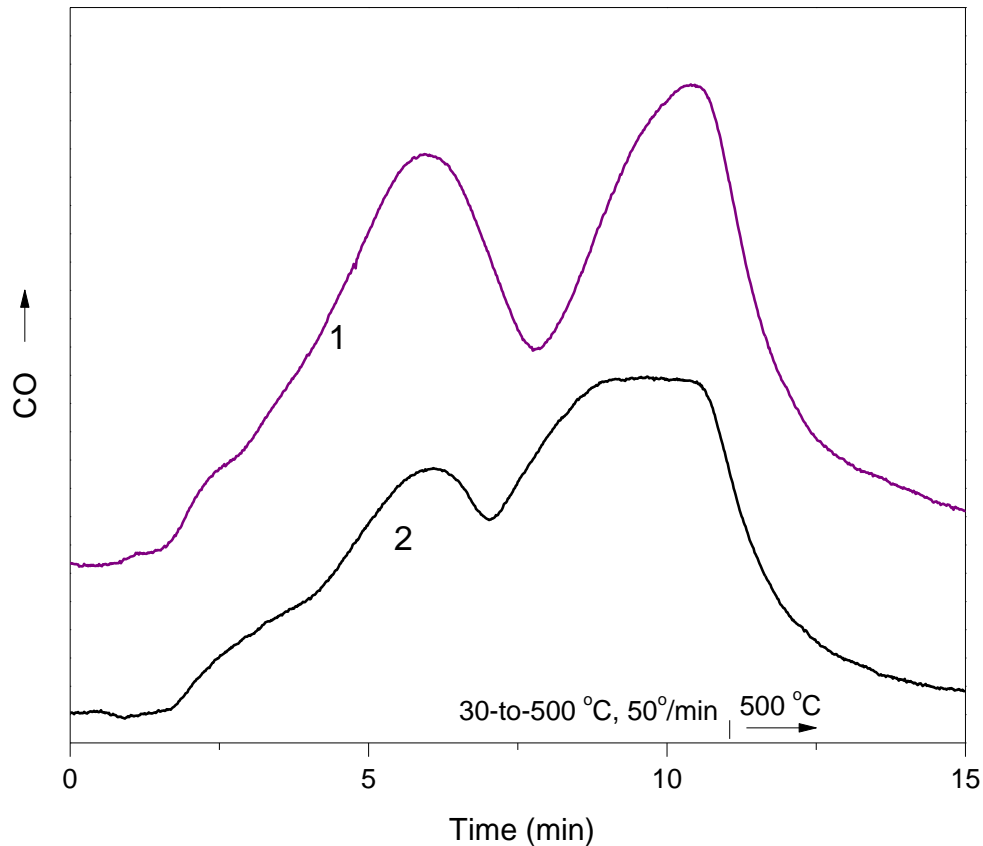

**Fig. S32.** CO TPD traces characteristic of fresh (1) and aged (2) 2.5%Pt/ $\gamma$ -Al<sub>2</sub>O<sub>3</sub> sample, after degassing and CO chemisorption. Sample mass 200 mg: sample (2) was previously used in a few series of experiments, including storage in air, reoxidation, and rereduction.

The Table below lists corresponding CO/CO<sub>2</sub> adsorption/desorption values. Note that the CO<sub>ads</sub>/Pt value for the aged sample is still rather high, corresponding to ~2 nm hemispherical Pt particles.

| Sample    | CO <sub>ads</sub> /Pt | CO <sub>ads</sub><br>μmol | CO <sub>des</sub><br>μmol | CO <sub>2,des</sub> *<br>μmol | CO <sub>des</sub> +CO <sub>2,des</sub><br>μmol |
|-----------|-----------------------|---------------------------|---------------------------|-------------------------------|------------------------------------------------|
| Fresh (1) | 0.68                  | 18.2                      | 11.5                      | 5.7                           | 17.2                                           |
| Aged (2)  | 0.52                  | 13.7                      | 7.3                       | 4.6                           | 11.9                                           |

\*As measured after accumulating CO<sub>2</sub> in the trap at 77 K.

## References

- S1 O. A. Yakovina and A. S. Lisitsyn, Probing the H<sub>2</sub>-induced restructuring of Pt nanoclusters by H<sub>2</sub>-TPD, *Langmuir*, 2016, **32**, 12013–12021.
- S2 A. S. Lisitsyn and O. A. Yakovina, On the origin of high-temperature phenomena in Pt/Al<sub>2</sub>O<sub>3</sub>. *Phys. Chem. Chem. Phys.*, 2018, **20**, 2339–2350.
- S3 R. S. Hansen, R. R. Frost and J. A. Murphy, The thermal conductivity of hydrogen-helium mixtures. *J. Phys. Chem.*, 1964, **68**, 2028–2029.
- S4 G. Castello, E. Biagini and S. Munari, The quantitative determination of hydrogen in gases, by gas chromatography with helium as the carrier gas. *J. Chromatogr. A*, 1965, **20**, 447–451.
